1 **Identification of proteins involved in *Trypanosoma brucei* DNA**  
2 **replication fork dynamics using nascent DNA proteomics**

3

4

5 Maria C Rocha-Granados<sup>1</sup>¶, Yahaira Bermudez<sup>1</sup>¶, Garvin Dodard<sup>1</sup>, Anthula V

6 Vandoros<sup>1</sup>, Arthur Günzl<sup>2</sup> and Michele M Klingbeil<sup>1,3\*</sup>

7

8

9 <sup>1</sup> Department of Microbiology, University of Massachusetts, Amherst, Massachusetts,  
10 United States

11

12

13 <sup>2</sup> Department of Genetics and Genome Sciences, UConn Health, Connecticut, United  
14 States

15

16

17 <sup>3</sup> The Institute of Applied Life Sciences, University of Massachusetts, Amherst,  
18 Massachusetts, United States

19

20 \* Corresponding author

21 Email: [klingbeil@microbio.umass.edu](mailto:klingbeil@microbio.umass.edu)

22

23 ¶These authors contributed equally to this work.

24

25 Short title: Trypanosome nascent DNA proteomics

26

27

## 28 Abstract

29 DNA replication, transcription and chromatin remodeling are coordinated to  
30 ensure accurate duplication of genetic and epigenetic information. In regard to DNA  
31 replication, trypanosomatid parasites such as *Trypanosoma brucei* display unusual  
32 properties including significantly fewer origins of replication than model eukaryotes, a  
33 highly divergent Origin Replication Complex (ORC), and an apparent lack of several  
34 replication factor homologs. Although recent studies in *T. brucei* indicate functional links  
35 among DNA replication, transcription, and antigenic variation, the underlying  
36 mechanisms remain unknown. Here, we adapted an unbiased technology for the  
37 identification of replication fork proteins called iPOND (isolation of proteins on nascent  
38 DNA) to *T. brucei*, its first application to a parasite system. This led to the mass  
39 spectrometric identification of core replication machinery and of proteins associated with  
40 transcription, chromatin organization, and DNA repair that were enriched in the vicinity  
41 of an unperturbed active replication fork. Of a total of 410 enriched proteins, among  
42 which DNA polymerase  $\alpha$  and replication factor C were scoring in the top, around 25%  
43 of the proteins identified were of unknown function and, therefore, have the potential to  
44 be essential trypanosome-specific replication proteins. Initial characterization of a  
45 protein annotated as a Replication Factor C subunit (Tb927.10.7990), and a protein of  
46 unknown function (Tb927.3.5370) revealed that both proteins retain nuclear localization  
47 throughout the cell cycle. While Tb927.3.5370 appeared to be a dispensable gene,  
48 Tb927.10.7990 proved to be essential since its silencing caused a growth defect in  
49 procyclic cells, accumulation of zoids and impaired DNA replication. Future studies on  
50 the generated proteins list can contribute to the understanding of DNA replication

51 dynamics in *T. brucei* and how replication is coordinated with other cellular processes to  
52 maintain genome integrity.

53

## 54 Introduction

55 Eukaryotic DNA replication is strictly coordinated and regulated by numerous  
56 molecular machines to ensure genomic stability for future cell generations. DNA  
57 replication initiation is coordinated with cell cycle progression through the multiprotein  
58 Origin Recognition Complex (ORC) that plays an essential role by recruiting proteins  
59 that lead to the assembly of the replicative machinery with the assistance of regulatory  
60 components Cdc6 and Cdt1. The key factors Cdc45, the MCM replicative helicase  
61 complex, and GINS proteins form the CMG complex that further recruits other  
62 replication factors such as the clamp loader Replication factor C (RFC), the clamp  
63 proliferating cell nuclear antigen (PCNA) and the three replicative DNA polymerases  
64 ( $\alpha$ ,  $\delta$ ,  $\epsilon$ ) leading to processive DNA replication [1,2].

65 Instead of the archetypical Origin Recognition Complex (Orc1-6) found in model  
66 eukaryotes, trypanosomes contain ORC1 and four other highly divergent ORC subunits  
67 (TbORC4, TbORC1b, Tb3120 and Tb7980) [3,4]. Components acting downstream of  
68 origin activation are conserved in trypanosomes including the MCM helicase, and  
69 portions of the DNA synthetic machinery [5]. However, initiation regulatory factors such  
70 as Cdc6 and Cdt1 are lacking, and Cdc45 displays an unorthodox mode of regulation  
71 being exported from the nucleus prior to mitosis [4]. Trypanosomes also lack some  
72 classical cell cycle checkpoints and it is also well known that there are significant  
73 differences in cell cycle regulation between different life cycle stages, although the

74 molecular mechanisms underlying these differences remain elusive [6,7].

75         Additionally, eukaryotic DNA replication is characterized as having multiple  
76 origins that are often defined by local DNA structure and chromatin environment rather  
77 than by sequence determinants [8–11]. Chromatin environment influences the spatial  
78 and temporal distribution of DNA replication events that are also coordinated with  
79 transcription. In mouse embryonic cells, 85% of the origins of replication (ORIs) are  
80 associated with annotated transcriptional units. Additionally, ORIs with higher firing  
81 efficiency are located at CpG islands of promoters [12]. Furthermore, 50% of all  
82 activated human ORIs overlap with transcription start sites (TSS), suggesting co-linear  
83 progression of DNA replication forks and transcription complexes to prevent head on  
84 collisions and potential collapse of the replication fork [13].

85         Evidence for functional interplay between DNA replication and transcription was  
86 also found in the trypanosomatid organisms *Leishmania major* and *T. brucei*. In *L.*  
87 *major*, ORIs were mapped preferentially at transcription termination sites (TTS),  
88 genomic locations where RNA pol II is expected to slow or stall [14].

89 This study concluded that there is coupling between origin activity and transcription,  
90 where DNA replication opportunistically initiates from genomic regions that have been  
91 available for RNA pol II elongation [14]. A global analysis of DNA replication initiation in  
92 *T. brucei* revealed that transcription and DNA replication initiation are coordinated in  
93 terms of genomic position [15,16] In *T. brucei*, genes are arranged as polycistronic  
94 transcription units also known as directional gene clusters (DGCs). Transcription of  
95 DGCs initiates at multiple positions either in divergent strand switch regions (dSSRs) in  
96 which DGCs are arranged head-to-head or, in some cases, between two arrays that

97 face the same direction in a head-to-tail region (HT) [17,18]. dSSRs and HTs are open  
98 chromatin regions occupied by acetylated histone H4 (H4K10ac), trimethylated H3  
99 (H3K4me3), histone variants H2A.Z and H2BV, and bromodomain factor 3 [19–22]. The  
100 replication initiator protein, TbORC1 prefers the same epigenetic landscape binding to  
101 divergent DGCs and the junctions between HT units proximal to H4K10Ac marks. This  
102 strong association revealed an unprecedented level of functional interaction between  
103 transcription and DNA replication in a eukaryotic genome. How these two machineries  
104 are coordinated spatially and temporally remains an open question. Collisions between  
105 the replication and transcription machinery are likely more frequent given the large  
106 tracks of co-directionally transcribed genes suggesting coordination between the  
107 transcription and DNA replication machinery or robust DNA replication restart machinery  
108 to overcome fork collapse.

109 Replication fork dynamics in *T. brucei* have mainly been gene-by-gene  
110 investigations that limit studying the machinery in a temporal fashion. The current  
111 minimal list of DNA replication factors were identified using biased approaches such as  
112 sequence similarity searches based on known replication factors in other model  
113 organisms, and affinity purification of associated factors with an already known protein  
114 as bait [3,4,23–27] While these studies provided valuable information indicating that the  
115 DNA replication machinery differs substantially from its host counterpart, the inventory  
116 of DNA replication factors, especially of regulatory factors and trypanosomatid-specific  
117 factors, remains incomplete [26].

118 One technique used to analyze replication fork dynamics and identify the proteins  
119 at the replication fork is iPOND (i)solation of p(roteins) o(n) n(ascent) D(NA) [28], a method

120 developed in the human system. In iPOND, newly replicated DNA is labeled with the  
121 thymidine analog 5-ethynyl-2'-deoxyuridine (EdU) [29]. EdU contains an alkyne  
122 functional group that enables the cycloaddition of a biotin azide. This click chemistry  
123 reaction [30] yields a stable covalent linkage, facilitating streptavidin capture of cross-  
124 linked biotinylated DNA-protein complexes [31]. Combination of the iPOND technology  
125 with mass spectrometry (MS) provides a site-specific analysis of replisomes by the  
126 identification of the proteins associated to replication forks and helps to determine how  
127 these factors are coordinated at the replication site to maintain the genome integrity  
128 [32]. iPOND offers an unparalleled ability to identify factors at active and damaged  
129 replication forks and to follow the spatial and temporal dynamics of these processes by  
130 varying the labeling period with EdU. Additionally, variations using pulse-chase  
131 experiments can distinguish between proteins that are specific to replication forks as  
132 opposed to proteins that are part of bulk chromatin. Recently, iPOND was adapted in  
133 vaccinia virus, the prototype poxvirus, to identify proteins involved in viral DNA  
134 replication [33]. In addition to known viral replication proteins, viral DNA-dependent RNA  
135 polymerase and transcription initiation and elongation factors were identified on nascent  
136 DNA. This suggested that there is temporal coupling of DNA replication and  
137 transcription at active replication forks in poxviruses [33].

138 In this study we adapted and applied iPOND technology for the first time in a  
139 human-pathogenic parasite, *T. brucei*. By coupling iPOND with label-free mass  
140 spectrometric quantification using iBAQ (Intensity-based absolute quantification) [34],  
141 we were able to identify 410 proteins that were cross-linked and enriched with nascent  
142 DNA. The list includes known replication factors together with DNA repair, transcription,

143 splicing, and chromatin organization factors. Nearly 25% of the data set were proteins of  
144 unknown function. Overall, we obtained a panoramic view of the cellular processes that  
145 appear to be coordinated with DNA replication and might help to maintain genomic  
146 stability. Additionally, we selected two proteins for initial characterization. These are a  
147 putative Replication Factor C subunit (RFC) and a protein of unknown function. Both  
148 proteins displayed nuclear localization. Only RFC proved to be essential in PCF cells.  
149 Cells in which this protein was depleted exhibited a DNA replication defect and growth  
150 impairment.

151

## 152 **Materials and Methods**

153 For Primer sequences refer to Supplemental Table 1 (S1 Table).

154

### 155 **Plasmid construction**

156 (i) PTP tagging. For PTP allelic tagging of *TbORC1*, *Tb427.03.5370* and *Tb427.10.7990*  
157 the C-terminal coding sequence was PCR amplified from *T. brucei* 427 genomic DNA  
158 and ligated into either pC-PTP-NEO [35] or pC-PTP-PURO [36]. In pORC1-PTP-NEO,  
159 p5370-PTP-NEO and p7990-PTP-PURO the corresponding gene sequences comprised  
160 the 3' terminal 1098, 699, and 498 bp of the coding regions, respectively. All final  
161 constructs were sequenced. For genome integration, pORC1-PTP-NEO was linearized  
162 with Sall, pTb5370-PTP-NEO with Aval, and pTb7990-PURO with XcmI.

163 (ii) RNAi. A pStL (stem-loop) vector for inducible gene silencing of each iPOND  
164 candidate was constructed as previously described [37]. Briefly, 542 bp or 417 bp of

165 Tb427.03.5370 or Tb427.10.7990 coding sequence respectively were PCR amplified  
166 from *T. brucei* 427 genomic DNA using appropriate primers (S1 Table). Final pStL5370  
167 and pStI7990 vectors were linearized with EcoRV for genome integration.

168

### 169 ***Trypanosoma brucei* Cell Lines**

170 Cultivation of the PCF *Trypanosoma brucei brucei* Lister 427 strain [38] and of the 29-  
171 13 strain for conditional gene silencing [37] was carried out as described. To generate  
172 cell lines expressing PTP-tagged proteins or inducible RNAi, 7.5 µg of linearized  
173 plasmid was transfected by nucleofection using an Amaxa nucleofector 2b (Lonza) [39]  
174 and cells were selected with either G418, puromycin or phleomycin. In the cell line  
175 ORC1<sup>PTP/WT</sup>, the second *TbORC1* allele was deleted using the Apal/NotI fragment from  
176 the pKOORC1-Hyg plasmid and selected using hygromycin [40]. The concentrations of  
177 selecting drugs in medium were 50 µg/ml of G418, 1 µg/ml of puromycin, 40 µg/ml of  
178 hygromycin and 2.5 µg/ml of phleomycin. Transgenic cell lines were cultured for no  
179 more than three weeks. For each transfection, correct DNA integration was confirmed  
180 by PCR of genomic DNA with at least one oligonucleotide hybridizing outside of the  
181 transfected nucleotide sequence (S1 Table). Conditional gene silencing experiments  
182 were performed by incubating trypanosomes in medium containing 1 µg/ml of  
183 tetracycline as described [37]. The single expresser clonal cell line ORC1<sup>PTP/KO</sup> P2C2  
184 (ORC1SE) was used for all iPOND experiments (10 hour doubling time).

185

### 186 ***Trypanosoma brucei* iPOND**

187 The original Cortez iPOND method was followed with several modifications [28].



188 A total of  $3 \cdot 10^{10}$  log phase TbORC1PTP cells were labeled with 150  $\mu$ M EdU (Santa  
189 Cruz) for 10 min. This length of time should label approximately 37 kb of DNA (see  
190 calculations in S1 Appendix). In the pulse-chase experiment, EdU labeling was followed  
191 by washing of cells once with temperature-equilibrated medium containing 150  $\mu$ M  
192 thymidine and incubation of cells in medium containing 150  $\mu$ M thymidine for a 60 min  
193 chase period prior to pelleting and cross-linking. Cells were pelleted at 3,000  $\times g$  for 7  
194 min, immediately resuspended at approximately  $7.5 \cdot 10^8$  cells/ml in SDM-79 medium  
195 containing 1.1% formaldehyde, and incubated for 20 min at room temperature (RT) to  
196 cross-link DNA-protein complexes. The reaction was quenched by adding 2 M glycine to  
197 a final concentration of 0.125 M and incubated for 5 min at RT. Fixed samples were  
198 washed three times with cold 1X phosphate buffer saline (PBS), and cell pellets flash  
199 frozen and stored at  $-80^{\circ}\text{C}$ . For further processing, samples were thawed on ice for 30  
200 min, resuspended with 0.25% Triton-X 100 in PBS in a volume to give an estimated cell  
201 density of  $1 \cdot 10^9$  cells/mL homogenized with 5 passes using a glass dounce, and then  
202 incubated for 30 min at RT with gently shaking. Samples were washed once with PBS  
203 containing 0.5% BSA and once with PBS, and the pellet was resuspended in click  
204 reaction cocktail (0.2 M biotin-azide, 50 mM sodium ascorbate, 10 mM  $\text{CuSO}_4$ ) at a  
205 volume of 5 ml for every  $1 \cdot 10^{10}$  total cells, and rotated for 2 hours at RT. Following the  
206 click reaction, cells were washed as specified above and resuspended in SME buffer  
207 (0.25 M sucrose, 10 mM MOPS pH 7.2, 2 mM EDTA, 1 mM PMSF,  $1\mu\text{g/ml}$  leupeptin  
208 and one tablet of cOmplete EDTA-free Protease Inhibitor Cocktail (Roche)) containing  
209 0.1% NP40 (cell density of  $1 \cdot 10^9$  cells/mL). This suspension was homogenized 30  
210 times with a glass dounce and incubated for 1 hour on ice with gentle shaking prior to

211 nitrogen cavitation at 2250 psi (20 min equilibration in SME buffer with 0.1% SDS). If  
212 necessary, this step was repeated (1500 psi and 10 min of equilibration) until >85% cell  
213 lysis (via microscopy) was achieved. Samples were centrifuged at 1250 x *g* for 10 min  
214 to obtain an enriched nuclear fraction (P1, S1 Fig), washed (SME, then PBS) and  
215 resuspended in sonication buffer (0.7% wt/vol SDS in 50 mM Tris pH 8.0, 1 µg/ml  
216 leupeptin and one tablet of cOmplete EDTA-free Protease Inhibitor Cocktail) by dounce  
217 homogenization. Samples were sonicated 5X (10 min, 30s <sup>ON/OFF</sup>) using the Bioruptor  
218 UCD-200 (Diagenode), and lysates cleared at 16,000 x *g* for 10 min at 4°C (Input). To  
219 capture biotinylated DNA-protein complexes, the Input sample was diluted with 1  
220 volume of PBS, mixed with PBS-equilibrated Streptavidin-agarose beads (250 µl beads  
221 slurry) (Novagen), and incubated overnight 4°C (16-20 hours) using a rotator. Beads  
222 were pelleted (1,800 x *g*, 3 min, RT) and washed once with streptavidin wash buffer (2%  
223 wt/vol SDS, 150 mM NaCl, 50 mM Tris-HCl, pH 7.4), once with 1M NaCl, and twice with  
224 streptavidin wash buffer. Each wash step included 5 min of rotation and centrifugation  
225 (1,800 x *g*, 1 min, RT). Tubes were changed between washes. Proteins were eluted by  
226 incubating the beads at 95°C for 25 min in 2X Laemmli sample buffer. As negative  
227 controls, cells were not exposed to EdU but treated with only DMSO, and cells exposed  
228 to EdU but treated with the click chemistry cocktail that lacked biotin-azide (C<sup>-</sup>) were  
229 generated. Three biological replicates were performed for each condition except the  
230 pulse-chase experiment where only one experiment was analyzed.

231

232

233

234

## 235 **DNA Fragmentation Analysis**

236 To analyze the extent of DNA fragmentation after sonication, lysate aliquots (50  
237  $\mu$ l) were subjected to cross-link reversal by adding NaCl to a final concentration of 0.2 M  
238 and incubating the samples overnight at 64 °C. Subsequently, samples were treated  
239 with 10  $\mu$ l RNase A (20 mg/ml) for 30 min at 37 °C followed by Proteinase K (Ambion)  
240 treatment for 2 hours at 45 °C (20  $\mu$ l of 0.5 M EDTA, 40  $\mu$ l of Tris pH 6.7 and 10  $\mu$ l of  
241 Proteinase K). Finally, DNA was prepared by phenol/chloroform extraction and ethanol  
242 precipitation, and quantified using a Nanodrop 8000 (Thermo Scientific). DNA samples  
243 (100 ng) were separated on a 1.5% agarose gel, stained with ethidium bromide and  
244 visualized under UV light.

245

## 246 **Dot Blot Click Chemistry Efficiency Test**

247 Biotinylated tubulin oligonucleotides (standard curve) and sonicated input fraction  
248 DNA (2  $\mu$ g per replicate) were treated with 1 M NaOH, heated at 55 °C (30 min)  
249 followed by addition of 2 M ammonium acetate to remove crosslinks. Oligo DNA and  
250 sonicated DNA samples (~100 ng) were spotted onto a nylon membrane (GE  
251 healthcare science). Oligo DNA (serially diluted ranging from 0.25 pmol to 16 pmol) was  
252 spotted in triplicate and input samples (~100 ng) were spotted in duplicate. Membrane  
253 was air-dried and cross-linked (Stratalinker 1800) then immediately placed in blocking  
254 solution (20% non-fat milk) for 2 hours at 37°C. Membrane was then rinsed three times  
255 in PBS + 0.1% Tween-20 and incubated with Avidin-HRP (1:3000, Life Technologies)  
256 for 30 min (37°C) followed by 3 washes in PBS + 0.1 % Tween-20, each for 15 min.

257 ImageQuant LAS 4000 mini (GE healthcare science) was used for chemiluminescence  
258 detection and data were quantified using ImageJ (version 1.51S). DNA from input  
259 fractions of each iPOND condition were quantified by nanodrop.

260

## 261 **EdU and PTP Immunofluorescence**

262 EdU incorporation for a 10 min pulse was confirmed using the Picolyl azide  
263 Toolkit (Life Technologies). Cells were labeled with 150  $\mu$ M EdU for 10 min, immediately  
264 harvested, washed with ice-cold PBS and adhered to poly-L-lysine coated slides (5  
265 min). Cells were then fixed in 3% paraformaldehyde (5 min, RT), washed in PBS  
266 containing 0.1 M glycine (pH7.4) three times (5 min, RT), and permeabilized with 0.1%  
267 Triton X-100 in PBS (5 min, RT). After three additional washes with PBS (5 min, RT),  
268 Click chemistry was performed using the Click-iT Plus Alexa Fluor Picolyl Azide Toolkit  
269 (Life Technologies) according to manufacturer's directions. Following click incubation for  
270 1 hour at RT, cells were washed three times (5 min, PBS) and processed for  
271 immunofluorescence. Cells were incubated with anti-protein A antibody (Sigma) diluted  
272 1:20,000 in PBS/1% BSA for 60 min, washed three times in PBS/0.1% Tween 20, and  
273 incubated with Alexa Fluor 594 goat anti-rabbit antibody diluted 1:250 in PBS/1% BSA  
274 for 60 min. DNA was stained with 3  $\mu$ g/ml 4'-6'-diamidino-2-phenylindole (DAPI), and  
275 slides were washed 3 times in PBS prior to mounting in Vectashield (Vector  
276 Laboratories). Parasites were visualized and images captured either with a Nikon  
277 Eclipse E600 microscope with a cooled CCD Spot-digital camera (Diagnostic  
278 Instruments) using a 100X Plan Fluo 1.3 (oil) objective or with a Nikon N-SIM E  
279 superresolution microscope equipped with an RCA-Flash 4.0 sCOS camera

280 (Hamamatsu Photonics) and a CFI SR Apochromate TIRF 100X (NA1.49) objective. Z-  
281 stacks (6  $\mu\text{m}$ , 240 nm thickness) were acquired using the NIS-Elements Ar software.  
282 Image slices were reconstructed using default software parameters and 3D  
283 deconvolution using the automatic method in NSIM modality was applied. Images'  
284 brightness and contrast were adjusted using Adobe Photoshop CS4 for presentation in  
285 figures.

286

### 287 **EdU labeling Quantification**

288 (i) Cell Cycle Analysis. Cells were incubated with 150  $\mu\text{M}$  EdU for 30 min,  
289 immediately harvested and processed as described above for EdU  
290 immunofluorescence. Cells were then incubated with rat monoclonal antibody YL1/2  
291 (Abcam) (60 min, 1:500 in PBS + 1% BSA), washed three times in PBS + 0.1% Tween  
292 20 and then incubated with Alexa Fluor 594 goat anti-rat, stained with DAPI and  
293 mounted as described above. At least 325 cells were scored for each time point. Only  
294 intact cells identified by phase contrast were included in the analysis. Cells were  
295 classified as EdU+ if fluorescence was detected. Position within the cell cycle was  
296 determined based on the kDNA morphology (DAPI staining) and number of basal  
297 bodies (YL1/2 staining). YL1/2 recognizes RP2, a protein that localizes to transitional  
298 fibers and is therefore a marker only for mature basal bodies [41,42]

299 (ii) EdU Fluorescence Intensity. Images were acquired using the Nikon E600/Spot  
300 digital camera system (described above). Non-saturating exposure times were used and  
301 non-adjusted images were analyzed using CellProfiler 3.0.0 [43] to measure EdU pixel  
302 intensity. Images were segmented with a DAPI signal to generate masks matching cell

303 nuclei from which the mean EdU signal was calculated. A minimum of 220 EdU positive  
304 (EdU+) cells were analyzed from each time point. Data were represented using Prism 7  
305 (GraphPad).

306

### 307 **SDS-PAGE and Western Blot Analysis**

308 Samples were fractionated by SDS-PAGE and transferred overnight to PVDF  
309 membrane. For Histone 3 (H3) detection, membranes were blocked in PBS + 3% non-  
310 fat milk for two hours and incubated with rabbit H3 antiserum (1:50,000, 0.3% blocking  
311 solution) for 2 hours. For mono-, di- and trimethylated H3 at lysine 76 (H3K76)  
312 detection, membranes were blocked in PBS + 3% BSA for 2 hours, and incubated with  
313 antiserum in 0.3% blocking (H3K76me1, 1:300; H3K76me2, 1:1500; H3K76me3,  
314 1:3000) for 2 hours. All H3 antibodies were kindly provided by Christian Janzen.  
315 ORC1PTP was detected using peroxidase-anti-peroxidase (PAP) (Sigma, 1:2000), and  
316 mtHsp70 was detected using *Crithidia fasciculata* specific antibody (1:10,000, gift from  
317 Paul Englund). Following primary antibody incubation, membranes were washed three  
318 times (PBS + 0.1% Tween-20) prior to incubation with appropriate horseradish  
319 peroxidase conjugated secondary antibodies in corresponding blocking solutions. Signal  
320 was detected with Clarity™ ECL Blotting Substrate (NEB) using GE Imagequant LAS  
321 4000.

322

### 323 **RNA Isolation and Quantitative reverse transcription-PCR Analysis.**

324 Total RNA was isolated from  $5 \cdot 10^7$  cells with Trizol (Thermo Fisher) according  
325 to the manufacturer's specifications. RNA concentration was determined using

326 Nanodrop, and 100 ng of total RNA was converted to cDNA using the High-Capacity  
327 cDNA Reverse Transcription Kit with RNase inhibitor and random primers (Thermo  
328 Fisher). qPCR was performed using QuantiNova SYBR Green PCR (Qiagen) with 1 µg  
329 of cDNA and 0.2 µM of primer (S1 Table) per reaction with a Stratagene MxPro 3000x  
330 thermocycler. All reactions were performed in triplicate. Gene knockdown was  
331 normalized with RNA of telomerase reverse transcriptase (TERT) [44].

332

### 333 **Mass Spectrometry Sample Preparation and Analysis**

334 Final protein elutions (30 µl) of iPOND experiments were separated by SDS-  
335 PAGE. The gel of a complete sample lane was excised in sections and sent for liquid  
336 chromatography/tandem mass spectrometry (LC/MS/MS) analysis. Samples were  
337 further processed by the Keck Biotechnology Center of Yale University using their  
338 standard protocols. Briefly, each sample was resuspended in 25 mM ammonium  
339 bicarbonate containing 2.5 ng/µl digestion grade trypsin (Promega) and incubated at  
340 37°C for 14 hours. After digestion, peptides were extracted from gels with two volumes  
341 of 80% acetonitrile, 0.1% formic acid for 15 minutes, then dried by speed vacuum.  
342 Peptides were dissolved in 30 µl of MS loading buffer (2% acetonitrile, 0.2%  
343 trifluoroacetic acid), with 5 µl injected for mass spectrometric analysis. LC/MS/MS  
344 acquisition was performed on a Thermo Scientific Q Exactive Plus coupled to a Waters  
345 nanoAcquity UPLC system.

346 For database searching, tandem mass spectra were extracted by Proteome  
347 Discoverer version 2.1.1.21 (Thermo Fisher). Charge state deconvolution and  
348 deisotoping were not performed. Data were searched in-house using the Mascot

349 algorithm (version 2.6.0) (Matrix Science, London, UK). Mascot was set up to search a  
350 *Trypanosoma brucei* database (version 27, containing Lister strain 427 and TREU927,  
351 downloaded from <http://tritrypdb.org/tritrypdb/>). Search parameters used were trypsin  
352 digestion (strict) with up to 2 missed cleavages, peptide mass tolerance of 10 ppm,  
353 MS/MS fragment tolerance of 0.02 Da, and variable modifications of methionine  
354 oxidation, propionamide adduct to cysteine, and deamidation of asparagine and  
355 glutamine.

356 Scaffold (version Scaffold\_4.8.2, Proteome Software Inc.) was used to validate  
357 MS/MS based peptide and protein identifications. Peptide identifications were accepted  
358 if they could be established at greater than 95.0% probability by the Scaffold Local FDR  
359 algorithm. Protein identifications were accepted if they could be established at greater  
360 than 99.0% probability and contained at least 2 identified peptides. Protein probabilities  
361 were assigned by the Protein Prophet algorithm (Nesvizhskii, 2003). Proteins that  
362 contained similar peptides and could not be differentiated based on MS/MS analysis  
363 alone were grouped to satisfy the principles of parsimony. Proteins sharing significant  
364 peptide sequence were grouped into clusters and were inspected individually.

365

## 366 **MS quantification**

367 Protein abundance was estimated using the iBAQ (Intensity-based absolute  
368 quantification) value of each protein hit in the four different samples in the Scaffold  
369 program. The iBAQ value is based on the sum of all identified peptides intensities  
370 matching to a specific protein divided by the number of theoretically peptides  
371 observable, yielding an accurate proxy of protein abundance [34]. Proteins were



372 considered to be enriched when they were identified in at least two of the three  
373 biological replicates and fulfilled the following criteria: (i) the protein hit must have a fold  
374 change over the No Click control that is equal or higher than 10, (ii) it must have a fold  
375 change over the DMSO control that is equal or higher than 1.5, and (iii) the protein  
376 should be a nuclear protein as determined by a recent nuclear proteome analysis [46],  
377 by the trypanosome genome wide localization resource [47], or have a predicted gene  
378 ontology (GO) term associated with a known nuclear protein. The lower fold change  
379 values for the DMSO control samples were likely due to the excess biotin azide from the  
380 click chemistry step that was incorporated as cofactor for some proteins (S2A Table).

381 To include proteins in our list that were identified in our nascent DNA analysis but  
382 absent in either negative control, e.g. obtained an infinite value (INF) for fold change,  
383 we set the fold change value from INF to the highest fold change value obtained in a  
384 particular experiment. To estimate a total score in order to rank the protein list the fold  
385 change (FC) EdU/No click and the FC EdU/DMSO were standardized to a 0-100 scale  
386 in each MS replicate. The average from each FC was calculated and the total score was  
387 determined by adding average FC EdU/No click by average FC EdU/DMSO.

388

### 389 **Bioinformatic Analysis**

390 UniProt IDs of the proteins identified were acquired using the TriTrypDB  
391 database accession numbers [48] (<http://www.tritrypdb.org/>). However, each protein did  
392 not have a UniProt ID. GO term analysis and enrichment was performed using  
393 PANTHER classification system [49]. The UniProt IDs list was mapped against the  
394 *Trypanosoma brucei* reference list in PANTHER version 13.0 (released version

395 20171205) with the following selections: analysis type, overrepresentation test;  
396 annotation database, PANTHER GO-slim Biological process; and test type, Fisher's  
397 Exact test with False discover rate (FDR) < 0.05. The results were sorted by  
398 hierarchically order to observe the enriched functional classes. Analysis of protein  
399 interaction networks was performed using STRING database [50]. Only interactions  
400 from curated databases and text-mining information were considered (confidence  
401 interaction score >0.65). The network was visualized using Cytoscape (version 3.6.0)  
402 and interaction groups were manually labeled based on GO term biological process  
403 [51].

404 Protein sequences from selected candidates were analyzed using the NCBI  
405 conserved domain database search (CDD) [52] to identify possible functional domains  
406 present in proteins of unknown function. Sequences were aligned using Clustal Omega  
407 with default parameters [53]. Motif search for Tb5370 was performed using the  
408 Eukaryotic Linear Motif (ELM) resource for Functional Sites in Proteins [54] with a  
409 cutoff for motif probability of 100.

410

411

## 412 Results and Discussion

### 413 *T. brucei* DNA replication properties for defining iPOND conditions

414 To purify proteins that associate with nascent DNA in *T. brucei*, we adapted the  
415 original iPOND method developed in the laboratory of Dr. David Cortez (Vanderbilt  
416 University) [32]. A major limitation of iPOND is the large amount of starting material  
417 needed to recover enough protein for proteomic analysis. Therefore, several aspects of

418 trypanosome biology were considered when calculating the amount of starting material  
419 needed for efficient purification. These parameters included the *T. brucei* genome size  
420 (26 Mbp) [5], the duration of S phase (90 min) [55], the percentage of S phase cells in  
421 an unsynchronized population (20%-30%) [56], the estimated number of early firing  
422 origins, and the PCF *T. brucei* DNA replication rate (3.7 kb/min) [57]. To obtain an  
423 approximate equal amount of EdU labeled DNA with that in mammalian iPOND ( $2.56 \cdot$   
424  $10^{13}$  kbp corresponding to 28.1  $\mu\text{g}$  DNA), we calculated that  $3 \cdot 10^{10}$  PCF cells were  
425 needed ( $2.59 \cdot 10^{13}$  kbp) to obtain a comparable amount of labeled DNA (Table 1).

426  
427  
428  
429  
430  
431  
432  
433  
434  
435  
436  
437  
438  
439  
440  
441  
442  
443  
444  
445  
446  
447  
448  
449  
450  
451  
452  
453  
454  
455

456  
457  
458  
459  
460  
461  
462  
463  
464  
465  
466  
467  
468  
469  
470  
471  
472  
473  
474  
475  
476  
477  
478  
479  
480  
481  
482  
483  
484  
485  
486  
487  
488  
489  
490  
491  
492  
  
493  
  
494  
  
495  
  
496

**Table 1. Comparison of mammalian and *T. brucei* DNA replication parameters**

| <b>Parameter</b>              | <b>Mammalian cells<br/>(293T)<sup>a</sup></b> | <b><i>Trypanosoma brucei</i><br/>(procyclic form)</b> |
|-------------------------------|-----------------------------------------------|-------------------------------------------------------|
| <b>Genome size</b>            | 3000 Mbp <sup>b</sup>                         | 26 Mbp                                                |
| <b>% of cells in S phase</b>  | 50% <sup>c</sup>                              | 20%-30% <sup>d</sup>                                  |
| <b>Replication time</b>       | 480 min <sup>e</sup>                          | 90 min                                                |
| <b>Replication rate</b>       | 1.5 kb/min <sup>f</sup>                       | 3.7 kb/min                                            |
| <b>~Kbp labeled in 10 min</b> | 15                                            | 37                                                    |
| <b>Estimate firing forks</b>  | 2138 <sup>g</sup>                             | 78 <sup>h</sup>                                       |
| <b>Kbp labeled/fork</b>       | 32070                                         | 2886                                                  |
| <b>Number of cells</b>        | 1.6 x 10 <sup>9</sup>                         | 3 x 10 <sup>10</sup>                                  |
| <b>Cells in S phase</b>       | 8 x 10 <sup>8</sup>                           | 7.5 x 10 <sup>9</sup>                                 |
| <b>Total labeled kbp</b>      | 2.56 x 10 <sup>13</sup>                       | 2.16 x 10 <sup>13</sup>                               |
| <b>Total µg labeled DNA</b>   | <b>28.1 µg</b>                                | <b>23.7 µg</b>                                        |
| <b>Total µg of DNA</b>        | 5399.1                                        | 854.6                                                 |
| <b>% DNA labeled</b>          | 0.52%                                         | 2.77%                                                 |

<sup>a</sup>Human embryonic kidney cells [31]

<sup>b</sup>[58]

<sup>c</sup>[59]

<sup>d</sup>[56]

<sup>e</sup>[60]

<sup>f</sup>[61]

<sup>g</sup>[62]

<sup>h</sup>See calculations in S1 Appendix

497 To establish iPOND in *T. brucei*, it was necessary to monitor the preparation of  
498 nuclei and the enrichment of nuclear proteins. Since there were no suitable antibodies  
499 for this purpose available, we took advantage of a previously established cell line in  
500 which the DNA replication initiation protein ORC1 was expressed from one allele with a  
501 C-terminal PTP tag [40]. To optimize analysis of ORC1-PTP we further manipulated the  
502 cells by knocking out the remaining wild-type allele, thereby generating a single  
503 expresser cell line (ORC1SE). We confirmed that the ORC1-PTP protein localized to  
504 the nucleus during all cell cycle stages and did not impact the fitness of the cells (S1A  
505 Fig). The ORC1SE cell line was used for all iPOND experiments and nuclear  
506 enrichment was tracked detecting the tag (S1D Fig).

507

#### 508 iPOND Optimization in *T. brucei*

509 Establishing the iPOND method in *T. brucei* required the optimization of several  
510 steps including EdU incorporation, click chemistry reaction, cell lysis, and DNA  
511 fragmentation (Fig 1A). Compared to mammalian cells where 10  $\mu$ M EdU is sufficient to  
512 label DNA in a 10 min pulse, *T. brucei* PCF required 150  $\mu$ M EdU to detect EdU-labeled  
513 DNA by fluorescence microscopy in the same period (Fig 1B). The lack of high affinity  
514 thymidine transporters can explain the higher concentration of EdU required for *T.*  
515 *brucei* labeling [63]. The high EdU concentration in our study is in accordance with other  
516 *T. brucei* labeling studies in which 100-300  $\mu$ M EdU was applied for 1 hr to uniformly  
517 label the nucleus for studies on PCNA [24,25]. Our conditions, however, resulted in  
518 discrete spots that likely represent replication foci (Fig 1B).

519 The iPOND technology relies on click chemistry, which is a copper-catalyzed  
520 reaction that allows the cycloaddition of an alkyne functional group (present in EdU) to  
521 an azide (conjugated to biotin) yielding a stable covalent bond [64,65]. Based on the  
522 higher EdU concentrations for labeling, we optimized the efficiency of the click  
523 chemistry reaction in *T. brucei* by increasing the final concentration of biotin azide (200  
524  $\mu\text{M}$ ) in the reaction cocktail 20-fold compared to mammalian conditions (10  $\mu\text{M}$ ). An  
525 increased amount of biotin azide was also used for iPOND in mouse embryonic cells  
526 [66].

527 Following the cross-linking step, standard lysis conditions resulted in incomplete  
528 lysis possibly due to a tightly cross-linked microtubule cytoskeleton [67]. Therefore,  
529 nitrogen cavitation was used in combination with detergent treatment to more efficiently  
530 lyse the cells (85-100% lysis). Despite the use of detergent in this extra step, we  
531 obtained a fraction enriched in seemingly intact nuclei (P1) with little visible  
532 contamination of kinetoplasts (mitochondrial DNA in *T. brucei*) or flagella (S1B, C Fig).  
533 Accordingly, ORC1-PTP was detected only in the P1 fraction while a mitochondrial  
534 matrix marker, Hsp70, was detected in both fractions (S1D Fig).

535 Compared to mammalian iPOND, additional rounds of sonication were required  
536 to shear the DNA to fragment sizes of 50-200 bp (Fig 1D), a range recommended for  
537 streptavidin capture of the cross-linked DNA-protein complexes. In order to monitor the  
538 amount of EdU-labeled DNA from sheared DNA samples (Input), we used a sensitive  
539 dot blot assay with a standard curve of biotinylated tubulin oligomers. For EdU pulse (E)  
540 experiments, 1.76 pmoles ( $\sim 0.12 \mu\text{g}$  of DNA) of biotinylated DNA was detected from the  
541 2  $\mu\text{g}$  of DNA that was spotted, while there was no detection in the negative controls (Fig

542 1C). Biotinylated DNA was also detected in the thymidine chase experiment (S1E Fig).  
543 These modifications were critical to achieve approximately 24  $\mu\text{g}$  of EdU-labeled DNA in  
544 a 10 min EdU pulse, comparable to the 28  $\mu\text{g}$  regularly obtained in mammalian iPOND.  
545 In a 10 min pulse, we should label  $\sim 37$  kbp. (Table 1). See S1 Appendix for details on  
546 calculations for iPOND.

547

## 548 Validation of iPOND

549 To differentiate between proteins associated with nascent DNA, such as DNA  
550 polymerase  $\alpha$  and the bulk of chromatin, such as modified histones, we compared  
551 iPOND from a 10 min EdU pulse with iPOND from a 10 min EdU pulse followed by a 60  
552 min ThD chase. The short pulse should restrict DNA labeling to the vicinity of the  
553 replication fork, while during the ThD chase labeled DNA should have moved away from  
554 the fork and undergone chromatin deposition and remodeling. Histone deposition  
555 (without modification) is coupled with DNA replication, although the precise timing of  
556 deposition is still debated [68,69].

557 In *T. brucei*, localization of posttranslational-modified histones have been studied  
558 during the cell cycle [70,71]. For example, immunolocalization of mono- (H3K76me1)  
559 and di-methylated H3 variants (H3K76me2) indicated that these modified histones are  
560 detected during mitosis and cytokinesis but not during S phase [70], whereas the  
561 H3K76me3 modification occurs during all cell cycle stages [71].

562 To test whether unmodified or K76-methylated histone H3 was present in our  
563 final iPOND eluates we carried out western blot analysis using *T. brucei* specific  
564 immune sera. There is minor detection of H3 in the EdU sample while its signal

565 increases in the ThD chase sample (Fig 1E, S2 Fig). Methylated H3 is mainly detected  
566 in the ThD chase sample (Fig. 1E). For some EdU samples minor amounts of  
567 H3K76me1 can be detected (Fig. 1E), however methylated H3 was rarely detected in  
568 the EdU samples (S2 Fig).

569 Quantification of band intensities revealed a 1.5% recovery of total H3 signal in  
570 the EdU elution compared to its input signal. In contrast, 13% of the H3 signal was  
571 recovered in the chase elution compared to the input. Additionally, the H3K76  
572 methylation variants are enriched in the chase sample with an average of 8.5%  
573 recovery. H3K76me3 is undetectable in the EdU pulse sample even when increased  
574 cell equivalents were loaded and longer exposures analyzed (S2 Fig). Even though  
575 H3K76me3 was previously detected in all cell cycle stages, its deposition may not occur  
576 on newly replicated DNA, possibly explaining why we could not detect it in our EdU  
577 elution (E) (Fig. 1E). These data suggest that in procyclic *T. brucei* deposition of  
578 unmodified histones occurs on nascent DNA and posttranslational modifications occur  
579 as the DNA moves away from the replication fork. In accordance with this notion,  
580 Histone 4 lysine 4 acetylation (H4K4ac) was found to be cell cycle regulated with  
581 unmodified H4K4 being highest during S phase [72].

582 Based on these results, it appeared that the differences between the EdU and ThD  
583 chase iPOND samples likely represent early replicating conditions for the short pulse  
584 and matured chromatin for the chase conditions and, therefore, were suitable for  
585 proteomic analyses.

586

587 Identification of proteins associated with nascent DNA



588 Proteins associated with nascent DNA (EdU pulse) from three biological  
589 replicates were isolated from gels, trypsin-digested, and analyzed by LC/MS/MS. To  
590 minimize the identification of false positives, we employed iBAQ to calculate fold  
591 changes (FC) between EdU pulse, negative controls and ThD chase samples (see  
592 methods for details). In addition, we restricted our analysis to known or putative nuclear  
593 proteins and disregarded proteins that are known standard contaminants of proteomic  
594 analyses such as low scoring ribosomal proteins, chaperones and proteins of  
595 retrotransposal origin [73]. A final score was calculated taking both the FC EdU/DMSO  
596 and the FC EdU/No Click into account (see S2 Appendix for details).

597 Based on these robust criteria, a total of 410 proteins were found to be enriched  
598 on nascent DNA (S2A Table). The genes of 98 proteins were annotated as “hypothetical  
599 conserved”, encoding proteins of unknown function (S2B Table). Gene Ontology (GO)  
600 enrichment analysis using the tool PANTHER [49] revealed 23 GO terms with >3-fold  
601 enrichment and a P-value of <0.001 (Fig 2A, S3 Table). The most abundant types of  
602 proteins were those involved in chromatin organization (fold enrichment, 10.7),  
603 transcription (9.91), DNA replication (7.43) and pre-mRNA splicing (7.03). To gain  
604 additional insight into the proteins enriched on trypanosome nascent DNA, we  
605 examined their potential relationships using the STRING database. In a STRING  
606 analysis, interactions are derived from multiple sources including curated databases  
607 that include known experimental interactions and text mining that incorporates  
608 prediction of interactions based on statistical links between proteins [50]. The analysis  
609 revealed a network of 9 clusters with abundant interactions between DNA replication

610 and the DNA repair and nucleic acid metabolism clusters. However, there were also  
611 abundant links between DNA replication and transcription clusters (Fig 2B).

612 As expected, known DNA replication proteins were enriched based on GO term  
613 analysis (fold enrichment of 7.43; P-value,  $1.4 \cdot 10^{-9}$ ) (Fig 2A, Table 2, S3 Table).  
614 Proteins forming the STRING replication cluster included MCM4 and MCM7 of the  
615 heterohexameric MCM complex (replicative helicase), DNA polymerases  $\alpha$  (Pol  $\alpha$ ) and  
616  $\delta$  (Pol  $\delta$ ) (DNA synthesis), PCNA, replication factor C subunits (processivity), and FEN-1  
617 endonuclease (Okazaki fragment processing). While several homologs of known *T.*  
618 *brucei* replication proteins were identified through iPOND and label free quantification in  
619 other systems [32,66], our analysis identified factors that were missing from these  
620 studies such as MCM and primase subunits (Table 2).

621  
622  
623  
624  
625  
626  
627  
628  
629  
630  
631  
632  
633  
634  
635  
636  
637  
638  
639  
640  
641  
642

643

**Table 2. DNA replication proteins identified in *T. brucei* iPOND**

| Tb427 Protein ID  | Tb927 Protein ID | Product Description                                 | Mol. Weight [kDa] | Ranking Position | Total Score | Identified by Cortez lab <sup>a</sup> | Identified by Ernforns lab <sup>b</sup> |
|-------------------|------------------|-----------------------------------------------------|-------------------|------------------|-------------|---------------------------------------|-----------------------------------------|
| Tb427.08.4880     | Tb927.8.4880     | DNA polymerase alpha catalytic subunit              | 152               | 9                | 134.02      | no                                    | yes                                     |
| Tb427tmp.01.4070  | Tb927.11.12250   | DNA replication licensing factor MCM4               | 93                | 13               | 132.20      | no                                    | yes                                     |
| Tb427.10.7990     | Tb927.10.7990    | ATPase, putative, replication factor 3              | 39                | 15               | 114.68      | no                                    | yes                                     |
| Tb427.03.830      | Tb927.3.830      | flap endonuclease-1 (FEN-1), putative               | 44                | 71               | 77.62       | no                                    | yes                                     |
| Tb427tmp.01.7810  | Tb927.11.16140   | DNA replication licensing factor MCM7               | 81                | 93               | 73.57       | no                                    | yes                                     |
| Tb427.03.1130     | Tb927.3.1130     | DNA polymerase delta subunit 2, putative            | 62                | 134              | 70.40       | no                                    | yes                                     |
| Tb427tmp.01.1310  | Tb927.11.9550    | replication factor C, subunit 4, putative           | 38                | 149              | 69.20       | yes                                   | yes                                     |
| Tb427tmp.211.3310 | Tb927.9.12300    | replication factor C, subunit 3, putative           | 40                | 180              | 51.86       | no                                    | yes                                     |
| Tb427.02.1800     | Tb927.2.1800     | DNA polymerase delta catalytic subunit, putative    | 117               | 189              | 48.39       | yes                                   | yes                                     |
| Tb427.06.3890     | Tb927.6.3890     | replication factor C, subunit 2, putative           | 39                | 216              | 42.93       | yes                                   | yes                                     |
| Tb427.07.2310     | Tb927.7.2310     | DNA primase small subunit, putative                 | 48                | 219              | 42.80       | no                                    | no                                      |
| Tb427tmp.02.3360  | Tb927.11.5650    | replication factor C, subunit 1, putative           | 65                | 238              | 41.01       | yes                                   | yes                                     |
| Tb427.04.1330     | Tb927.4.1330     | DNA topoisomerase IB, large subunit                 | 79                | 283              | 37.39       | yes                                   | no                                      |
| Tb427tmp.160.3710 | Tb927.9.5190     | proliferative cell nuclear antigen (PCNA), putative | 32                | 311              | 28.61       | yes                                   | yes                                     |
| Tb427.06.4780     | Tb927.6.4780     | DNA ligase I, putative                              | 83                | 319              | 18.60       | yes                                   | yes                                     |
| Tb427tmp.01.0870  | Tb927.11.9130    | Replication factor A protein 1                      | 52                | 321              | 17.37       | yes                                   | no                                      |
| Tb427.05.1700     | Tb927.5.1700     | replication Factor A 28 kDa subunit, putative       | 28                | 388              | 7.89        | no                                    | no                                      |

644

645

646 <sup>a</sup>[32]

647 <sup>b</sup>[66]

648

649

650

651

## 652 DNA replication proteins

653 PCNA, a key component of DNA replication as the sliding clamp, serves as a  
654 binding scaffold for numerous replication and DNA damage proteins [74]. In the  
655 replication cluster, PCNA was a key node to other DNA replication proteins but also to  
656 other clusters (Fig. 2B, purple node). Its interactions with a subunit of the replication  
657 factor complex (RFC1; Fig 2B, yellow node), and from RPA (RFA1; Fig 2B, green  
658 node), as well as interactions with MCM4 (Fig 2B, pink node) and DNA polymerase  $\alpha$   
659 (Pol  $\alpha$ ; Fig. 2B, red node) were expected. RFC1 is part of the clamp loader involved in  
660 PCNA loading, and RFA1 is part of the single-stranded DNA-binding protein complex  
661 RPA [75]. *T. brucei* RFC1 and RFA1 were enriched in our data set having ranking  
662 positions of 238 and 321 respectively, while PCNA ranked 311 (Table 2, S2A Table). *T.*  
663 *brucei* PCNA shows nuclear localization during the G1/S transition and S phase,  
664 regulation of its proper levels is critical for DNA replication and proliferation and is  
665 uniquely regulated by the kinase TbERK8 [24,25,27]. MCM4 ranked much higher at 13.  
666 The *T. brucei* MCM complex has been characterized and the single MCM4 subunit was  
667 able to unwind circular DNA *in vitro* as well as the complex [4].

668 Interestingly, the most enriched DNA replication protein was the Pol  $\alpha$  catalytic  
669 subunit (ranking 9) (Table 2; S2A Table). Pol  $\alpha$  is recruited to the replication fork after  
670 the CMG complex (**C**dc45, **M**CM 2-7 subunits and the **G**INS complex) and activated by  
671 MCM10, triggering DNA unwinding at the origin of replication [76,77]. Pol  $\alpha$  synthesizes  
672 RNA primers and physically interacts with RFC1 and RFA1 at the replication fork [75].  
673 With the exception of PCNA and the MCM subunits, there are no functional studies for  
674 the core replication proteins. Some known replication factors did not display high scores

675 and other known DNA replication proteins did not pass the filtering criteria including  
676 DNA polymerase epsilon catalytic subunit, MCM2, Replication Factor A (51 kDa  
677 subunit) and DNA topoisomerase II. This is possibly due to low copy numbers of these  
678 proteins at the replication fork or less efficient interaction with the DNA.

679 Several proteins of unknown function are likely to be DNA replication or repair  
680 proteins based on the presence of conserved domains. For example, Tb927.3.5370 and  
681 Tb927.9.10400 contain regions of similarity to type II DNA topoisomerases. DNA  
682 topoisomerases manage the topological state of the DNA, with type II enzymes  
683 catalyzing the passage of one double stranded DNA duplex through a break in another  
684 DNA duplex in an ATP dependent mechanism [78,79]. A range of processes including  
685 DNA replication, DNA repair, sister chromatid segregation, chromosome condensation  
686 and catenation rely on type II topoisomerases [80,81].

687 Another interesting candidate, Tb927.9.15070, has similarity to DNA processing A  
688 (DprA) superfamily (NCBI Conserved Domains Database, cl22881). DprA is a bacterial  
689 member of the larger, extremely diverse recombination mediator protein (RMP) family.  
690 RMPs facilitate binding of RecA-like recombinases (RecA, Rad51) to DNA damage sites  
691 for the repair of broken chromosomes and other types of DNA lesions [82].

692 To test if the DNA replication proteins identified are enriched on nascent DNA,  
693 we calculated the FC EdU/ThD chase for these proteins. We compared the ThD chase  
694 sample with the three EdU pulse replicates and the FC estimated in each EdU pulse  
695 was added to obtain an average FC. From this analysis, RFC4 and MCM4 were only  
696 detected in the EdU and absent in the ThD chase sample (INF value). The remaining  
697 known DNA replication proteins have a total FC ranging from 0.6 to 4.7, where PCNA is

698 highly enriched (S2C Table) compared to the ThD chase sample. Therefore, DNA  
699 replication proteins such as MCM4 and PCNA are in close proximity to the replication  
700 fork in the EdU pulse and as the labeled DNA moves away from the fork in the  
701 thymidine chase, these proteins are not enriched or are no longer detected. Our results  
702 are in agreement with iPOND results from other systems [28,66,83],

703

#### 704 Other enriched proteins

705 Our data set revealed DNA repair as a GO term (S2D Table) with a fold  
706 enrichment of 5.43 (P-value  $8.10 \cdot 10^{-8}$ ). RAD54 (rank 12) and RAD51 (rank 378)  
707 participate in repairing DNA double-strand breaks by homologous recombination and  
708 have physical and functional interaction. RAD54 drives branch migration and stimulates  
709 RAD51 strand exchange activity [84] whereas RAD51 mediates homology search,  
710 strand invasion, and D-loop formation steps [85]. When RAD51 was knocked out in *T.*  
711 *brucei*, the parasites were more sensitive to DNA damaging agents [86]. The fact that  
712 we are enriching proteins related to DNA repair on nascent DNA might indicate that  
713 DNA repair is active during new synthesis or shortly after DNA is replicated.

714 Using SV40 minichromosomes, nucleosomes were shown to assemble  
715 immediately behind the DNA replication fork with the first deposited nucleosome  
716 detected at a distance of only ~250 bp from the replication fork [87]. An estimated 37  
717 kbp of *T. brucei* DNA can be labeled in a 10 min EdU pulse. Therefore, if nucleosome  
718 assembly occurs similarly near the active fork, it would be expected to find enrichment  
719 of these assembly/remodeling proteins on nascent DNA in *T. brucei*. Accordingly, we  
720 found that chromatin organization had the highest fold enrichment (10.70; P-value of

721  $2.91 \cdot 10^{-12}$ ) (Fig 2A, S3 Table). Nucleosome components such as histone 3 (H3), 4  
722 (H4), 2A (H2A), 2B (H2B), 2A variant Z (H2A.Z), 2B variant (H2BV) and 3 variant (H3V)  
723 were all detected in the data set (S2A and S2D Tables). H2A.Z and H2BV are  
724 specifically deposited at TSSs, whereas H3V was found at TTSs [19]. Histone  
725 chaperones such as FACT, contribute to rapid nucleosome assembly at the replication  
726 fork, and chromatin remodeling enzymes such as Isw1 help load and position  
727 nucleosomes during DNA replication [69]. Accordingly, there are representatives from at  
728 least 3 chromatin remodeling complexes present in the data set, namely both FACT  
729 subunits (rank 212, 375), two INO80 RuvB-like proteins (rank 338,397), and 3 of the 4  
730 ISWI complex proteins (rank 96, 255, 324). In addition, several other putative  
731 nucleosome assembly proteins were detected (S2E Table). Interestingly, when  
732 comparing average FC EdU/ThD chase, several of the chromatin associated proteins,  
733 especially the FACT components, were enriched on nascent DNA further supporting the  
734 notion that nucleosome assembly occurs in proximity to the replication  
735 fork (S2E Table).

736         There are numerous examples replication and transcription responding to similar  
737 cues from the chromatin landscape in eukaryotes. Genome-wide studies in *Drosophila*  
738 revealed that early replicating regions were associated with increased transcriptional  
739 activity, activating chromatin marks (acetylation), and increased ORC binding, while late  
740 replicating regions were associated with repressive histone marks (methylation) [88,89].  
741 Genome-wide analyses of *T. brucei* ORC1 binding revealed surprisingly few origins of  
742 replication (~100) that map to the boundaries of their DGC revealing an unprecedented  
743 level of functional interaction between transcription and DNA replication [15].

744 Additionally, in the related trypanosomatid *L. major*, genome-wide studies indicated that  
745 initiation and timing of DNA replication depend on RNA pol II transcription dynamics that  
746 also serve as a driving force for nucleosomal organization [14].

747 In support of an intimate association between transcription and DNA replication  
748 machineries, the transcription GO term had a 9.91-fold enrichment (P-value of  $3.66 \cdot$   
749  $10^4$ ) (Fig 2A; Table 3), and STRING analysis showed transcription proteins interacting  
750 with all clusters except for nuclear transport and protein metabolism (Fig 2B). Notably,  
751 the main subunits of all three nuclear RNA polymerases were identified which may  
752 reflect the facts that RNA pol I in trypanosomes transcribes the genes encoding the  
753 parasite's major cell surface proteins [90] and that RNA pol III transcribes genes often  
754 located in convergent SSRs [19,91]. A small percentage (7%) of early replicating  
755 TbORC1 binding sites are associated with convergent SSRs, and these sites could  
756 overlap with RNA Pol III transcription start sites [15,19,91]. Other important transcription  
757 proteins identified include TATA-box binding protein (rank 16), two elongation factors  
758 (rank 98, 110), and several basal transcription initiation factors (rank 68, 72, 131, 147,  
759 240). These findings are in accordance with enrichment of transcription machinery in  
760 iPOND studies conducted in other systems [33,66,83].

761

762

763

764

765

766



**Table 3. List of Transcription related protein identified in *T. brucei* iPOND**

| Tb427 Protein ID  | Tb927 Protein ID | Product Description                                                  | Mol. Weight [kDa] | Ranking Position | Total Score |
|-------------------|------------------|----------------------------------------------------------------------|-------------------|------------------|-------------|
| Tb427.04.5320     | Tb927.4.5320     | Component of IIS longevity pathway SMK-1, putative                   | 97                | 7                | 134.65      |
| Tb427.10.15950    | Tb927.10.15950   | TATA-box-binding protein                                             | 29                | 16               | 109.87      |
| Tb427.10.2780     | Tb927.4.5020     | DNA-directed RNA polymerase II subunit RPB1                          | 170               | 29               | 104.03      |
| Tb427tmp.47.0010  | Tb927.11.1390    | class I transcription factor A, subunit 1                            | 53                | 68               | 78.98       |
| Tb427.01.1700     | Tb927.1.1700     | AATF protein, putative (Apoptosis-antagonizing transcription factor) | 55                | 69               | 78.31       |
| Tb427.02.5030     | Tb927.2.5030     | transcription initiation protein, putative                           | 80                | 72               | 77.59       |
| Tb427.01.1680     | Tb927.1.1680     | Transcription elongation factor 1 domain-containing protein          | 26                | 98               | 73.27       |
| Tb427.04.3510     | Tb927.4.3490     | DNA-directed RNA polymerases II and III subunit RPB6, putative       | 16                | 99               | 73.21       |
| Tb427.08.5090     | Tb927.8.5090     | DNA-directed RNA polymerase I largest subunit                        | 196               | 104              | 73.03       |
| Tb427tmp.03.0760  | Tb927.11.370     | repressor activator protein 1                                        | 93                | 105              | 72.94       |
| Tb427.02.3580     | Tb927.2.3580     | transcription elongation factor s-II, putative                       | 52                | 110              | 72.53       |
| Tb427.08.5980     | Tb927.8.5980     | TFIIH basal transcription factor complex helicase subunit, putative  | 92                | 131              | 70.54       |
| Tb427tmp.01.5370  | Tb927.11.13810   | ATP- dependent RNA helicase, putative                                | 63                | 143              | 70.00       |
| Tb427tmp.01.1200  | Tb927.11.9430    | TFIIH basal transcription factor subunit                             | 41                | 147              | 69.28       |
| Tb427tmp.02.0970  | Tb927.11.3480    | Sin-like protein conserved region, putative                          | 79                | 200              | 45.94       |
| Tb427.01.540      | Tb927.1.540      | DNA-directed RNA polymerase III, putative                            | 127               | 217              | 42.92       |
| Tb427.10.8720     | Tb927.10.8720    | CCR4-NOT transcription complex subunit 10, putative                  | 61                | 236              | 41.14       |
| Tb427tmp.47.0008  | Tb927.11.1410    | class I transcription factor A, subunit 3                            | 47                | 240              | 40.68       |
| Tb427.10.15370    | Tb927.10.15370   | DNA-directed RNA polymerases I and III subunit RPAC1, putative       | 37                | 242              | 40.47       |
| Tb427tmp.160.4220 | Tb927.9.5710     | general transcription factor IIB                                     | 38                | 245              | 40.30       |
| Tb427.03.1270     | Tb927.3.1270     | PRP38 family, putative                                               | 61                | 256              | 39.67       |
| Tb427.04.1310     | Tb927.4.1310     | ZFP family member, putative zin finger transcription factor          | 47                | 294              | 36.37       |
| Tb427tmp.03.0450  | Tb927.11.630     | RNA polymerase I second largest subunit                              | 179               | 323              | 16.03       |
| Tb427.04.3810     | Tb927.4.3810     | DNA-directed RNA polymerase II subunit 2, putative                   | 134               | 336              | 13.67       |
| Tb427tmp.211.3840 | Tb927.9.12900    | RNA polymerase-associated protein LEO1, putative                     | 65                | 354              | 10.92       |
| Tb05.5K5.70       | Tb927.5.4420     | nucleolar RNA helicase II, putative                                  | 69                | 380              | 38.72       |
| Tb427.08.1510     | Tb927.8.1510     | ATP-dependent RNA helicase DBP2B, putative                           | 62                | 381              | 8.68        |
| Tb11.v5.0414      | Tb927.10.540     | ATP-dependent RNA helicase SUB2, putative                            | 49                | 407              | 4.28        |

768           Interestingly, proteins involved in pre-mRNA splicing were also enriched on  
769 nascent DNA (GO term fold enrichment of 7.03 P-value of  $2.21 \cdot 10^{-7}$ ) (Fig 2A,S2F  
770 Table). Proteins that are part of the spliceosome such as SmB (rank 42), SmD2 (rank  
771 163) and U5-40K (rank 308) were identified. Also, proteins involved in polyadenylation  
772 and capping were identified (S2E Table). Recently, the link between nucleosome  
773 occupancy, RNA pol II levels and splicing elements in *T. brucei* was addressed [92]. In  
774 this study, RNA pol II sites were found in close proximity to regions marked by the  
775 histone variant H2A.Z and were associated with TSS. The RNA Pol II enrichment could  
776 indicate transcription pausing when encountering nucleosomes and can cause a  
777 recruitment of the splicing factors [92]. H2A.Z, RNA pol II subunits and splicing factors  
778 are enriched in our data set suggesting that co-transcriptional splicing events might  
779 occur in near proximity of newly replicated DNA.

780

## 781 Analysis of Newly Identified Factors.

782           To begin a functional analysis of our data set, we selected the putative replication  
783 protein RFC3 (Tb927.10.7990; rank 15) and a protein of unknown function,  
784 Tb927.3.5370 (rank 123) that contained a conserved Type II-like topoisomerase  
785 domain. To date, there have been no functional studies for any of the RFC subunits.  
786 Using TritrypDB resources, Tb7990 appeared to be important for parasite fitness in RIT-  
787 seq analysis but showed little change in transcript levels during the cell cycle [93,94]. In  
788 contrast, Tb5370 was not greatly affected in RIT-seq but showed cell cycle-dependent  
789 changes in transcript levels that peaked during S phase. In the high-throughput TrypTag  
790 study [47], both proteins localized to the nucleus.

791 Tb5370 was selected because of its strong expression during S-phase and its  
792 possible association with type II topoisomerases that relieve topological constraints  
793 produced in many processes including DNA replication and transcription. The NCBI  
794 Conserved Domain Database [52] revealed similarity to a Top2c domain (domain  
795 PTZ00108, E-value  $5.16 \times 10^{-5}$ ). However, protein alignment of Tb5370 with other type  
796 II topoisomerases showed Tb5370 was lacking key residues involved in topoisomerase  
797 activity. By inspecting for other conserved motifs in Tb5370 and the corresponding  
798 homologs in other trypanosomatids, we identified an FHA (forkheaded associated  
799 domain) phosphopeptide ligand motif and the cyclin dependent kinases (CDK)  
800 phosphorylation site motif (S3 Fig). Importantly, using the phosphoproteomic data  
801 available for *T. brucei* [95], three serine residues are phosphorylated in the CDK  
802 phosphorylation motif of Tb5370 suggesting it is likely controlled by a kinase (S3 Fig).  
803 CDKs phosphorylate protein substrates that are associated with regulation of cell cycle  
804 transitions [96], such as DNA synthesis and mitosis [97]. In addition, these kinases also  
805 phosphorylates proteins involved in DNA damage [98]. Since Tb5370 is predicted to  
806 have FHA motifs which are present in proteins involved in DNA repair and transcription  
807 [99], and to be phosphorylated by CDKs, we decided to further evaluate this gene to  
808 assess if is essential in *T. brucei*.

809 Tb7990 was annotated as RFC3. Replication factor C (RFC) is a five-subunit  
810 complex that catalyzes the ATP-dependent loading of PCNA onto DNA for replication  
811 and repair. The five essential subunits contain the ATP-binding Walker A motif with the  
812 consensus sequence GxxxxGKK, the magnesium ion-binding Walker B motif hhhhNExx  
813 that is required for ATP hydrolysis [100], and the SRC motif, also called an arginine

814 finger, that senses bound ATP and participates in ATP hydrolysis [101]. RFC5 subunits  
815 differ slightly in having an imperfect Walker B motif that prevents ATP hydrolysis [101].  
816 Tb7990 contains the three conserved motifs (S4 Fig), however Tb7990 has distinct  
817 substitutions in the Walker A (GxxxxGKT) and Walker B (hhhhDExx) motifs.

818 To evaluate the nuclear localization of these proteins during the cell cycle, each  
819 factor was fused at the C-terminus with the PTP tag and expressed from their  
820 respective endogenous locus in clonal procyclic cell lines. To directly examine  
821 localization of the tagged proteins during DNA replication, we labeled bulk DNA with  
822 DAPI and newly synthesized DNA with EdU (Fig 3). We applied structured illumination  
823 microscopy (SIM) to visualize at high-resolution colocalization of the tagged protein with  
824 EdU foci following 10 min of labeling. Both proteins displayed nuclear localization  
825 throughout the cell cycle. The Tb5370-PTP signal localized more at the nuclear  
826 periphery reminiscent of nuclear pores and did not appear to overlap with EdU foci (Fig  
827 3A). This distinct pattern was retained even during mitosis (data not shown). Tb7990-  
828 PTP localized as several punctate foci and was excluded from the nucleolus. While  
829 there was colocalization with EdU foci, the two patterns did not precisely overlap,  
830 suggesting Tb7990 may have roles other than DNA replication (Fig 3B). There are four  
831 different RFC complexes in eukaryotes: RFC1-RFC, Ctf18-RFC, Elg1-RFC and Rad17-  
832 RFC [102]. These three complexes share the four small RFC subunits (RFC2, 3, 4, and  
833 5) but differ in the large subunit [103,104]. RFC1-RFC is the canonical RFC complex  
834 that acts as a processivity factor for DNA polymerases during replication [105]. Ctf18-  
835 RFC is involved in chromatid cohesion [106], Elg1-RFC plays role in genome stability  
836 [107] and Rad17-RFC is part of the DNA damage checkpoint response [108].

837           The function of Tb5370 was further explored using a stemloop RNAi construct to  
838 deplete its mRNA in a tetracycline-dependent manner. However, there was no loss of  
839 fitness following induction of RNAi. Tb5370 RNAi cells before and after tetracycline  
840 induction were harvested for RNA isolation and mRNA levels were monitored using RT-  
841 qPCR (S5 Fig). *Tb5370* mRNA levels were reduced 80-90% in several clones that were  
842 analyzed. It appears that Tb5370 is not essential under standard growth conditions,  
843 however a role in DNA repair cannot be ruled out at this point.

844           To further investigate the function of Tb7990, this gene was silenced using  
845 inducible RNAi. We prepared total RNA from uninduced and tetracycline-treated cells  
846 after 48 hr of growth and monitored mRNA levels using RT-qPCR (Fig 4A, inset).  
847 *Tb7990* mRNA levels were reduced ~75% with a corresponding decrease in fitness  
848 starting on day 3 (Fig 4A). To characterize the effect of Tb7990 depletion on cell cycle  
849 progression and DNA replication directly, cells before and after tetracycline induction  
850 were examined using fluorescence microscopy. Since the kinetoplast (K) divides before  
851 the nucleus (N), the trypanosome cell cycle stage can be determined by examining  
852 DAPI-stained cells in an asynchronous population [56]. Additionally, the appearance of  
853 2 mature basal bodies is used to mark the onset of kDNA replication (1N1K\*) and is  
854 easily visualized using the YL1/2 antibody that is a marker for mature basal bodies. The  
855 percentage of cells with 1N1K, 1N1K\*, 1N2K and 2N2K configurations were scored (Fig  
856 4B, S6 Fig). Tb7990 silencing led to a transient increase in 1N1K\* cells, but resulted in  
857 an overall decline after 4 days (from 40 to 18%). There was a gradual decline of 1N1K  
858 cells (from 42 to 28%) that was accompanied by an increase in 0N1K cells (zoids) from  
859 less than 1 to 20% of the population. Cells with other abnormal configurations also

860 increased by day 5 (from 0 to 12%). Thus, these data indicate that silencing Tb7990  
861 resulted in impaired cell cycle progression. It is important to note that in procyclic *T.*  
862 *brucei*, cell division can proceed in the absence of nuclear division or even nuclear S  
863 phase to give rise to anucleate cells (zoids) [109–111]. Additionally, the appearance of  
864 zoids and disruption of cell cycle progression was reported for silencing of the DNA  
865 replication initiation proteins TbORC1 and MCM subunits [4,40].

866 To directly test whether Tb7990-depleted cells were defective in DNA replication,  
867 the same cells were metabolically labeled with EdU following the induction of Tb7990  
868 dsRNA, and nascent DNA was detected by indirect immunofluorescence microscopy.  
869 Cells were scored for the absence (EdU-) or presence (EdU+) of EdU labeling. In an  
870 asynchronous uninduced population, 41.1% of the cells exhibited an EdU-dependent  
871 fluorescence signal (EdU+) with the great majority of cells being 1N1K\* (40.2%).  
872 Following Tb7990 depletion, there was an initial increase in the percentage of EdU+  
873 cells that subsequently declined to 26% at Day 5. The percentage of EdU+ 1N1K\* cells  
874 decreased while the percentage of EdU+ 1N2K cells increased indicating that  
875 progression through S phase was impaired and cells were not progressing through  
876 mitosis to G2 (Fig 4B, S6 Fig).

877 In addition to the overall decline in EdU+ cells, the fluorescence intensity of the  
878 EdU+ cell population also decreased following 5 days of Tb7990 silencing (S6 Fig). To  
879 evaluate statistical significance, we used CellProfiler [43] to score fluorescence intensity  
880 in at least 220 EdU+ cells for each time point (Fig 4C). In uninduced cells, there is a  
881 distribution of fluorescence intensity ranging from 0.055-0.20 representing cells at the  
882 various phases of DNA replication in an unsynchronized population. Interestingly, there

883 was an increase in fluorescence intensity observed at Day 3 in which the mean intensity  
884 increased and the range was broader (0.064-0.28) compared to uninduced (P-value  
885 <0.0001). During this time point some of the highest EdU fluorescence intensities were  
886 recorded and this timepoint corresponded to an increase in 1N2K cells as well as the  
887 percentage of 1N2K cells that were EdU+. By the last day of the RNAi induction, the  
888 mean EdU fluorescence intensity decreased even below uninduced values and had the  
889 lowest intensities as well as the lowest range (0.011-0.18) compared to all days (D3/D5  
890 P-value <0.0001; Un/D5 P-value <0.02). Together these data demonstrate a role in  
891 DNA replication by both a reduction in the number of EdU+ cells and decreases in EdU  
892 incorporation.

893         The Tb7990 RNAi DNA replication defect was similar to the defects reported for  
894 silencing *T. brucei* ORC1, MCM subunits (3, 5 and 7) and PCNA in procyclic cells  
895 [4,25,40]. Knockdowns of these genes led to a gradual decline in the number of 1N1K  
896 cells that was accompanied by a gradual increase in zoid cells (0N1K) and a subtle  
897 increase in the 1N2K population, although there was variation in the percentages of  
898 cells at each of these cell stages. The accumulation of 1N2K cells can be the result of  
899 incomplete mitosis (a nuclear segregation defect) or some perturbation of S phase  
900 preventing the cells from initiating mitosis. Both defects can result in progeny where one  
901 cell receives some proportion of nuclear material while the other cell receives only a  
902 kinetoplast (zoid) (Fig 4D) due to the lack of a classical mitosis to cytokinesis checkpoint  
903 in procyclic trypanosomes [109–111]. The combined accumulation of zoids and  
904 transient increase in 1N2K cells appears to be a hallmark of DNA replication defects.

905

## 906 **Conclusion**

907           Here, we have established the iPOND technology, for the first time in a parasitic  
908 system. It is a powerful tool that provided a global view of proteins that are enriched at  
909 nascent DNA under unperturbed replication conditions in *T. brucei* PCF cells. Our data  
910 suggest that DNA replication, transcription, chromatin organization and pre-mRNA  
911 splicing events all occur on and or near nascent DNA. These different cellular  
912 processes may be coordinated or just occur in the vicinity of each other. Based on our  
913 observations, we propose nucleosomes are assembled close to the replication fork  
914 followed by RNA pol II recruitment, transcription, and co-transcriptional RNA  
915 processing. Further studies are needed to determine how these processes are linked  
916 and co-regulated, and how rapidly they are initiated during DNA replication.

917           In addition, our data set has provided a list of proteins of unknown function that  
918 can be characterized to determine their function in DNA replication and/or at nascent  
919 DNA. They could represent essential trypanosomatid-specific factors or extremely  
920 divergent homologues of known replication factors and, therefore, represent promising  
921 targets of chemotherapeutic intervention. The initial characterization of the protein  
922 candidate Tb7990, a replication factor C subunit, indicated an essential role in DNA  
923 replication that was quantified using EdU incorporation and microscopy assays.

924           However, many of the DNA replication proteins identified in our data set have not been  
925 studied and their future characterization using our strategy to detect replication defects  
926 will contribute to the understanding of DNA replication in *T. brucei*.

927



## 928 Acknowledgements

929 This work was partially supported by a UMass Graduate School Grant to MCR, and a  
930 Faculty Research Grant to MMK. NIH grant AI126455 to MMK supported this work.

931 We thank David Cortez and Jared Nordman for discussions and ideas. We are grateful  
932 to Christian Janzen for providing the H3 antibodies, Paul Englund for the mtHsp70  
933 antibodies, and Bibo Li for the pKOORC1-Hyg plasmid. The superresolution microscopy  
934 data were gathered in the Light Microscopy Facility Nikon center of Excellence at the  
935 Institute for Applied Life Sciences, UMass Amherst, with support from the  
936 Massachusetts Life Sciences center.

937

938

939

940

941

942

943

944

945

## 946 Figure Legends

947 **Figure 1. Optimization of iPOND in *T. brucei*.** (A) Schematic overview of modified  
948 iPOND procedure for *T. brucei*. Red, modifications that were implemented compared to  
949 the original iPOND protocol performed in mammalian cells. (B) EdU incorporation in  
950 newly synthesized DNA in *T. brucei*. In a 10 min EdU pulse, newly synthesized DNA  
951 was successfully labeled. DNA is stained with DAPI. Size bar 5  $\mu$ m. (C) Quantification  
952 of biotinylated DNA. Biotin incorporation was measured in sonicated samples (input)  
953 from negative controls (DMSO; D and Click-; C-), ThD chase (T), and EdU pulse (E)  
954 samples. Approximately 2  $\mu$ g of DNA from sonicated samples (input) were applied to a  
955 Hybond membrane. Biotinylated DNA was detected using Avidin HRP. Graph,  
956 standards (blue circles) and EdU sample (red square) were plotted. (D) DNA  
957 fragmentation analysis. 5 cycles of sonication yielded DNA fragments between 50 bp to  
958 200 bp, 100 bp fragments are enriched in all iPOND conditions. (E) Detection of Histone  
959 3. H3 was used as a DNA-bound protein marker. Input (In) and final elution (Elu)  
960 fractions were probed against H3 and one, two and three methylation groups present H3  
961 Lysine 76 (H3K76met) in the four iPOND conditions.

962  
963  
964 **Figure 2. Gene ontology enrichment and protein network in *T. brucei* iPOND.** (A)  
965 PANTHER Gene ontology (GO) analysis of the proteins identified on nascent DNA.  
966 Graph represents the fold enrichment of each GO term in a hierarchy order. Only GO  
967 terms with a fold enrichment above 3 were plotted. (B) Panoramic landscape of the  
968 protein-protein interaction network analysis of an active replication fork in *T. brucei*  
969 defined by STRING. Relevant interactions and most representative groups are  
970 displayed. The topology is organized according to functional classification. Highlighted  
971 nodes: DNA polymerase  $\alpha$ , red; Replication Factor C, yellow; Replication Factor A  
972 subunit 1, green; MCM4, pink; and PCNA, purple.

973  
974 **Figure 3. Intranuclear localization of two iPOND candidates.** Localization of PTP-  
975 tagged proteins in asynchronous populations labeled with EdU using SIM microscopy.  
976 PTP tag was detected with anti-protein A (red), EdU incorporation (green) and DNA was  
977 stained with DAPI (blue). Enlargements correspond to the white dashed boxes. (A)  
978 Tb5370-PTP tagged cell line (B) Tb7990-PTP tagged cell line. Size bar, 5  $\mu$ m.

979  
980  
981 **Fig 4. Silencing of Tb7990 by RNAi.** (A) Tb7990 Growth curves, in the presence and  
982 absence of tetracycline. Inset, qPCR (B) Quantification of cell cycle stages following  
983 Tb7990 RNAi. Cells were induced for RNAi (0 – 5 days), EdU labeled for 10 min, fixed,  
984 and processed for detection of EdU, basal bodies and DNA. Cells (~325/day) were  
985 scored by fluorescence microscopy according to the number of kinetoplasts (K) and  
986 nuclei (N), EdU+ nuclei, and number of basal bodies. Some categories (e.g. 2N0K,  
987 2N1K, multiple nuclei) comprised <2% of the total and grouped as Other. Images show  
988 examples of each cell type scored and key to bar graphs. (C) Each dot represents the  
989 mean EdU signal per nucleus for each condition after a 30 min pulse with 150  $\mu$ M EdU.

990 **(D)** Model for production of zoids (adapted from [112]). Larger circles, nuclei; small  
991 ovals, kDNA; black, EdU-; green, EdU+.

992

993

## 994 References

- 995 1. Fragkos M, Ganier O, Coulombe P, Méchali M. DNA replication origin activation in  
996 space and time. *Nat Rev Mol Cell Biol*. Nature Publishing Group; 2015;16: 360–  
997 374. doi:10.1038/nrm4002
- 998 2. Snedeker J, Wooten M, Chen X. The Inherent Asymmetry of DNA Replication.  
999 *Annu Rev Cell Dev Biol Annu Rev Cell Dev Biol*. 2017;33: 291–318.  
1000 doi:10.1146/annurev-cellbio-100616
- 1001 3. Tiengwe C, Marcello L, Farr H, Gadelha C, Burchmore R, Barry JD, et al.  
1002 Identification of ORC1/CDC6-interacting factors in trypanosoma brucei reveals  
1003 critical features of origin recognition complex architecture. *PLoS One*. 2012;7: 22–  
1004 24. doi:10.1371/journal.pone.0032674
- 1005 4. Dang HQ, Li Z. The Cdc45 Mcm2-7 GINS protein complex in trypanosomes  
1006 regulates DNA replication and interacts with two Orc1-like proteins in the origin  
1007 recognition complex. *J Biol Chem*. 2011;286: 32424–32435.  
1008 doi:10.1074/jbc.M111.240143
- 1009 5. Berriman M, Ghedin E, Hertz-Fowler C, Blandin G, Renauld H, Bartholomeu DC,  
1010 et al. The genome of the African trypanosome *Trypanosoma brucei*. *Science*.  
1011 2005;309: 416–422. doi:10.1126/science.1112642
- 1012 6. Hammarton TC. Cell cycle regulation in *Trypanosoma brucei*. *Mol Biochem*  
1013 *Parasitol*. Elsevier B.V.; 2007;153: 1–8. doi:10.1016/j.molbiopara.2007.01.017
- 1014 7. Qing Z, Hu H, Li Z. New Insights into the Molecular Mechanisms of Mitosis and  
1015 Cytokinesis in Trypanosome. *Int Rev Cell Mol Biol*. 2014. doi:10.1016/B978-0-12-  
1016 800097-7.00004-X.New
- 1017 8. Cayrou C, Coulombe P, Vigneron A, Stanojic S, Ganier O, Peiffer I, et al.  
1018 Genome-scale analysis of metazoan replication origins reveals their organization  
1019 in specific but flexible sites defined by conserved features. *Genome Res*.  
1020 2011;21: 1438–1449. doi:10.1101/gr.121830.111
- 1021 9. Kanter DM, Bruck I, Kaplan DL. Mcm subunits can assemble into two different  
1022 active unwinding complexes. *J Biol Chem*. 2008;283: 31172–31182.  
1023 doi:10.1074/jbc.M804686200
- 1024 10. Costa A, Hood I V., Berger JM. Mechanisms for Initiating Cellular DNA  
1025 Replication. *Annu Rev Biochem*. 2013;82: 25–54. doi:10.1146/annurev-biochem-  
1026 052610-094414
- 1027 11. Kurat CF, Yeeles JTP, Patel H, Early A, Diffley JFX. Chromatin Controls DNA  
1028 Replication Origin Selection, Lagging-Strand Synthesis, and Replication Fork  
1029 Rates. *Mol Cell*. Elsevier Inc.; 2017;65: 117–130.  
1030 doi:10.1016/j.molcel.2016.11.016
- 1031 12. Sequeira-Mendes J, Díaz-Uriarte R, Apedaile A, Huntley D, Brockdorff N, Gómez  
1032 M. Transcription initiation activity sets replication origin efficiency in mammalian  
1033 cells. *PLoS Genet*. 2009;5. doi:10.1371/journal.pgen.1000446

- 1034 13. Langley AR, Gräff S, Smith JC, Krude T. Genome-wide identification and  
1035 characterisation of human DNA replication origins by initiation site sequencing  
1036 (ini-seq). *Nucleic Acids Res.* 2016;44: 10230–10247. doi:10.1093/nar/gkw760  
1037 14. Lombraña R, Alvarez A, Fernandez-Justel JM, Almeida R, Poza-Carrion C,  
1038 Gomes F, et al. Transcriptionally Driven DNA Replication Program of the Human  
1039 Parasite *Leishmania major*. *Cell Rep.* 2016;16: 1774–1786.  
1040 doi:10.1016/j.celrep.2016.07.007  
1041 15. Tiengwe C, Marcello L, Farr H, Dickens N, Kelly S, Swiderski M, et al. Genome-  
1042 wide analysis reveals extensive functional interaction between DNA replication  
1043 initiation and transcription in the genome of *trypanosoma brucei*. *Cell Rep.*  
1044 Elsevier; 2012;2: 185–197. doi:10.1016/j.celrep.2012.06.007  
1045 16. Tiengwe C, Marques CA, McCulloch R. Nuclear DNA replication initiation in  
1046 kinetoplastid parasites: New insights into an ancient process. *Trends Parasitol.*  
1047 Elsevier Ltd; 2014;30: 27–36. doi:10.1016/j.pt.2013.10.009  
1048 17. Martínez-Calvillo S, Yan S, Nguyen D, Fox M, Stuart K, Myler PJ. Transcription of  
1049 *Leishmania major* Friedlin chromosome 1 initiates in both directions within a  
1050 single region. *Mol Cell.* 2003;11: 1291–1299. doi:10.1016/S1097-2765(03)00143-  
1051 6  
1052 18. Kolev NG, Franklin JB, Carmi S, Shi H, Michaeli S, Tschudi C. The transcriptome  
1053 of the human pathogen *Trypanosoma brucei* at single-nucleotide resolution. *PLoS*  
1054 *Pathog.* 2010;6: 1–15. doi:10.1371/journal.ppat.1001090  
1055 19. Siegel TN, Hekstra DR, Kemp LE, Figueiredo LM, Lowell JE, Fenyo D, et al. Four  
1056 histone variants mark the boundaries of polycistronic transcription units in  
1057 *Trypanosoma brucei*. *Genes Dev.* 2009;23: 1063–1076.  
1058 doi:10.1101/gad.1790409.7  
1059 20. Daniels J-P, Gull K, Wickstead B. Cell Biology of the Trypanosome Genome.  
1060 *Microbiol Mol Biol Rev.* 2010;74: 552–569. doi:10.1128/MMBR.00024-10  
1061 21. Siegel TN, Gunasekera K, Cross GAM, Ochsenreiter T. Gene expression in  
1062 *Trypanosoma brucei*: Lessons from high-throughput RNA sequencing. *Trends*  
1063 *Parasitol.* Elsevier Ltd; 2011;27: 434–441. doi:10.1016/j.pt.2011.05.006  
1064 22. Wright JR, Siegel TN, Cross GAM. Histone H3 trimethylated at lysine 4 is  
1065 enriched at probable transcription start sites in *Trypanosoma brucei*. *Mol Biochem*  
1066 *Parasitol.* Elsevier B.V.; 2010;172: 141–144.  
1067 doi:10.1016/j.molbiopara.2010.03.013  
1068 23. De Melo Godoy PD, Nogueira-Junior LA, Paes LS, Cornejo A, Martins RM, Silber  
1069 AM, et al. Trypanosome prereplication machinery contains a single functional  
1070 *Orc1/Cdc6* protein, which is typical of archaea. *Eukaryot Cell.* 2009;8: 1592–1603.  
1071 doi:10.1128/EC.00161-09  
1072 24. Kaufmann D, Gassen A, Maiser A, Leonhardt H, Janzen CJ. Regulation and  
1073 spatial organization of PCNA in *Trypanosoma brucei*. *Biochem Biophys Res*  
1074 *Commun.* Elsevier Inc.; 2012;419: 698–702. doi:10.1016/j.bbrc.2012.02.082  
1075 25. Valenciano AL, Ramsey AC, Mackey ZB. Deviating the level of proliferating cell  
1076 nuclear antigen in *trypanosoma brucei* elicits distinct mechanisms for inhibiting  
1077 proliferation and cell cycle progression. *Cell Cycle.* 2015;14: 674–688.  
1078 doi:10.4161/15384101.2014.987611  
1079 26. da Silva MS, Pavani RS, Damasceno JD, Marques CA, McCulloch R, Tosi LRO,

- 1080 et al. Nuclear DNA Replication in Trypanosomatids: There Are No Easy Methods  
1081 for Solving Difficult Problems. *Trends Parasitol.* Elsevier Ltd; 2017;33: 858–874.  
1082 doi:10.1016/j.pt.2017.08.002
- 1083 27. Valenciano AL, Knudsen GM, Mackey ZB. Extracellular-signal regulated kinase 8  
1084 of *Trypanosoma brucei* uniquely phosphorylates its proliferating cell nuclear  
1085 antigen homolog and reveals exploitable properties. *Cell Cycle.* Taylor & Francis;  
1086 2016;15: 2827–2841. doi:10.1080/15384101.2016.1222340
- 1087 28. Sirbu BM, Couch FB, Feigerle JT, Bhaskara S, Hiebert SW, Cortez D. Analysis of  
1088 protein dynamics at active , stalled , and collapsed replication forks. *Genes Dev.*  
1089 2011;25: 1320–1327. doi:10.1101/gad.2053211.Venkitaraman
- 1090 29. Salic A, Mitchison TJ. A chemical method for fast and sensitive detection of DNA  
1091 synthesis in vivo. *Proc Natl Acad Sci U S A.* 2008;105: 2415–2420.  
1092 doi:10.1073/pnas.0712168105
- 1093 30. Kolb HC, Finn MG, Sharpless KB. Click Chemistry: Diverse Chemical Function  
1094 from a Few Good Reactions. *Angew Chem Int Ed.* 2001;40: 2004–2021.  
1095 doi:10.1002/1521-3773(20010601)40:11<2004::AID-ANIE2004>3.0.CO;2-5
- 1096 31. Sirbu BM, Couch FB, Cortez D. Monitoring the spatiotemporal dynamics of  
1097 proteins at replication forks and in assembled chromatin using isolation of proteins  
1098 on nascent DNA. *Nat Protoc.* Nature Publishing Group; 2012;7: 594–605.  
1099 doi:10.1038/nprot.2012.010
- 1100 32. Sirbu BM, McDonald WH, Dungrawala H, Badu-Nkansah A, Kavanaugh GM,  
1101 Chen Y, et al. Identification of proteins at active, stalled, and collapsed replication  
1102 forks using isolation of proteins on nascent DNA (iPOND) coupled with mass  
1103 spectrometry. *J Biol Chem.* 2013;288: 31458–31467.  
1104 doi:10.1074/jbc.M113.511337
- 1105 33. Senkevich TG, Katsafanas GC, Weisberg A, Olano LR, Moss B. Identification of  
1106 vaccinia virus replisome and transcriptome proteins by isolation of proteins on  
1107 nascent DNA coupled with mass spectrometry. *J Virol.* 2017;91: 1–20.  
1108 doi:10.1128/JVI.01015-17
- 1109 34. Schwanhüsser B, Busse D, Li N, Dittmar G, Schuchhardt J, Wolf J, et al. Global  
1110 quantification of mammalian gene expression control. *Nature.* 2011;473: 337–  
1111 342. doi:10.1038/nature10098
- 1112 35. Schimanski B, Nguyen TN, Gu A. Highly Efficient Tandem Affinity Purification of  
1113 Trypanosome Protein Complexes Based on a Novel Epitope Combination.  
1114 *Eukaryot Cell.* 2005;4: 1942–1950. doi:10.1128/EC.4.11.1942
- 1115 36. Bruhn DF, Mozeleski B, Falkin L, Klingbeil MM. Mitochondrial DNA polymerase  
1116 POLIB is essential for minicircle DNA replication in African trypanosomes. *Mol*  
1117 *Microbiol.* 2010;75: 1414–1425. doi:10.1111/j.1365-2958.2010.07061.x
- 1118 37. Chandler J, Vadoros A V., Mozeleski B, Klingbeil MM. Stem-loop silencing  
1119 reveals that a third mitochondrial DNA polymerase, POLID, is required for  
1120 kinetoplast DNA replication in trypanosomes. *Eukaryot Cell.* 2008;7: 2141–2146.  
1121 doi:10.1128/EC.00199-08
- 1122 38. Concepción-Acevedo J, Luo J, Klingbeil MM. Dynamic localization of  
1123 *Trypanosoma brucei* mitochondrial DNA polymerase ID. *Eukaryot Cell.* 2012;11:  
1124 844–55. doi:10.1128/EC.05291-11
- 1125 39. Sakyama J, Zimmer SL, Ciganda M, Williams N, Read LK. Ribosome biogenesis



- 1126 requires a highly diverged XRN family 5'->3' exoribonuclease for rRNA  
1127 processing in *Trypanosoma brucei*. *Rna*. 2013;19: 1419–1431.  
1128 doi:10.1261/rna.038547.113
- 1129 40. Benmerzouga I, Concepción-Acevedo J, Kim HS, Vadoros A V., Cross GAM,  
1130 Klingbeil MM, et al. *Trypanosoma brucei* Orc1 is essential for nuclear DNA  
1131 replication and affects both VSG silencing and VSG switching. *Mol Microbiol*.  
1132 2013;87: 196–210. doi:10.1111/mmi.12093
- 1133 41. Harmer J, Qi X, Toniolo G, Patel A, Shaw H, Benson FE, et al. Variation in Basal  
1134 Body Localisation and Targeting of Trypanosome RP2 and FOR20 Proteins.  
1135 *Protist*. Elsevier GmbH.; 2017;168: 452–466. doi:10.1016/j.protis.2017.07.002
- 1136 42. Andre J, Kerry L, Qi X, Hawkins E, Drižyte K, Ginger ML, et al. An alternative  
1137 model for the role of RP2 protein in flagellum assembly in the African  
1138 trypanosome. *J Biol Chem*. 2014;289: 464–475. doi:10.1074/jbc.M113.509521
- 1139 43. Carpenter AE, Jones TR, Lamprecht MR, Clarke C, Kang IH, Friman O, et al.  
1140 CellProfiler: image analysis software for identifying and quantifying cell  
1141 phenotypes. *Genome Biol*. 2006;7. doi:10.1186/gb-2006-7-10-r100
- 1142 44. Brenndörfer M, Boshart M. Selection of reference genes for mRNA quantification  
1143 in *Trypanosoma brucei*. *Mol Biochem Parasitol*. 2010;172: 52–55.  
1144 doi:10.1016/j.molbiopara.2010.03.007
- 1145 45. Nesvizhskii AI, Keller A. A statistical model for identifying proteins by tandem  
1146 mass spectrometry. *Anal Chem*. 2003;75: 4646–4658. doi:10.1021/ac0341261
- 1147 46. Goos C, Dejung M, Janzen CJ, Butter F, Kramer S. The nuclear proteome of  
1148 *Trypanosoma brucei*. *PLoS One*. 2017;12: e0181884.  
1149 doi:10.1371/journal.pone.0181884
- 1150 47. Dean S, Sunter JD, Wheeler RJ. TrypTag.org: A Trypanosome Genome-wide  
1151 Protein Localisation Resource. *Trends Parasitol*. Elsevier Ltd; 2017;33: 80–82.  
1152 doi:10.1016/j.pt.2016.10.009
- 1153 48. Aslett M, Aurrecochea C, Berriman M, Brestelli J, Brunk BP, Carrington M, et al.  
1154 TriTrypDB: A functional genomic resource for the Trypanosomatidae. *Nucleic  
1155 Acids Res*. 2009;38: 457–462. doi:10.1093/nar/gkp851
- 1156 49. Mi H, Muruganujan A, Casagrande JT, Thomas PD. Large-scale gene function  
1157 analysis with the panther classification system. *Nat Protoc*. 2013;8: 1551–1566.  
1158 doi:10.1038/nprot.2013.092
- 1159 50. Szklarczyk D, Franceschini A, Wyder S, Forslund K, Heller D, Huerta-Cepas J, et  
1160 al. STRING v10: Protein-protein interaction networks, integrated over the tree of  
1161 life. *Nucleic Acids Res*. 2015;43: D447–D452. doi:10.1093/nar/gku1003
- 1162 51. Smoot ME, Ono K, Ruscheinski J, Wang PL, Ideker T. Cytoscape 2.8: New  
1163 features for data integration and network visualization. *Bioinformatics*. 2011;27:  
1164 431–432. doi:10.1093/bioinformatics/btq675
- 1165 52. Marchler-Bauer A, Bo Y, Han L, He J, Lanczycki CJ, Lu S, et al. CDD/SPARCLE:  
1166 Functional classification of proteins via subfamily domain architectures. *Nucleic  
1167 Acids Res*. 2017;45: D200–D203. doi:10.1093/nar/gkw1129
- 1168 53. Sievers F, Wilm A, Dineen D, Gibson TJ, Karplus K, Li W, et al. Fast, scalable  
1169 generation of high-quality protein multiple sequence alignments using Clustal  
1170 Omega. *Mol Syst Biol*. 2011;7. doi:10.1038/msb.2011.75
- 1171 54. Dinkel H, Roey K Van, Michael S, Kumar M, Uyar B, Altenberg B, et al. ELM 2016

- 1172 — data update and new functionality of the eukaryotic linear motif resource.  
1173 Nucleic Acids Res. 2018;44: 294–300. doi:10.1093/nar/gkv1291
- 1174 55. Woodward R, Gull K. Timing of nuclear and kinetoplast DNA replication and early  
1175 morphological events in the cell cycle of *Trypanosoma brucei*. J Cell Sci. 1990;95:  
1176 49–57.
- 1177 56. Siegel TN, Hekstra DR, Cross GAM. Analysis of the *Trypanosoma brucei* cell  
1178 cycle by quantitative DAPI imaging. Mol Biochem Parasitol. 2008;160: 171–174.  
1179 doi:10.1016/j.molbiopara.2008.04.004
- 1180 57. Calderano SG, Drosopoulos WC, Quaresma MM, Marques CA, Kosiyatrakul S,  
1181 McCulloch R, et al. Single molecule analysis of *Trypanosoma brucei* DNA  
1182 replication dynamics. Nucleic Acids Res. 2015;43: 2655–2665.  
1183 doi:10.1093/nar/gku1389
- 1184 58. Venter JC, Adams MD, Myers EW, Li PW, Mural RJ, Sutton GG, et al. The  
1185 sequence of the human genome. Science. 2009;291: 1304–1351.  
1186 doi:10.1126/science.1058040
- 1187 59. Burgess A, Lorca T, Castro A. Quantitative Live Imaging of Endogenous DNA  
1188 Replication in Mammalian Cells. PLoS One. 2012;7.  
1189 doi:10.1371/journal.pone.0045726
- 1190 60. Conti C, Sacca B, Herrick J, Lalou C, Pommier Y, Bensimon A. Replication Fork  
1191 Velocities at Adjacent Replication Origins Are Coordinately Modified during DNA  
1192 Replication in Human Cells. Int J Biol Sci. 2007;6: 569–583. doi:10.1091/mbc.E06
- 1193 61. Jackson DA, Pombo A. Replicon Clusters Are Stable Units of Chromosome  
1194 Structure Evidence That Nuclear Organization Contributes to the Efficient  
1195 Activation and Propagation of S Phase in Human Cells. J Cell Biol. 1998;140:  
1196 1285–1295.
- 1197 62. DePamphilis M, Bell SD. Genome duplication. Concepts, mechanisms, evolution,  
1198 and disease. New York: Garland Science; 2011.
- 1199 63. Ranjbarian F, Vodnala M, Vodnala SM, Rofougaran R, Thelander L, Hofer A.  
1200 *Trypanosoma brucei* thymidine kinase is tandem protein consisting of two  
1201 homologous parts, which together enable efficient substrate binding. J Biol Chem.  
1202 2012;287: 17628–17636. doi:10.1074/jbc.M112.340059
- 1203 64. Cavanagh BL, Walker T, Norazit A, Meedeniya ACB. Thymidine analogues for  
1204 tracking DNA synthesis. Molecules. 2011;16: 7980–7993.  
1205 doi:10.3390/molecules16097980
- 1206 65. Moses JE, Moorhouse AD. The growing applications of click chemistry. Chem  
1207 Soc Rev. 2007;36: 1249–1262. doi:10.1039/b613014n
- 1208 66. Aranda S, Rutishauser D, Ernfors P. Identification of a large protein network  
1209 involved in epigenetic transmission in replicating DNA of embryonic stem cells.  
1210 Nucleic Acids Res. 2014;42: 6972–6986. doi:10.1093/nar/gku374
- 1211 67. Sherwin T, Gull K. Visualization of detyrosination along single microtubules  
1212 reveals novel mechanisms of assembly during cytoskeletal duplication in  
1213 trypanosomes. Cell. 1989;57: 211–221. doi:10.1016/0092-8674(89)90959-8
- 1214 68. Prado F, Maya D. Regulation of replication fork advance and stability by  
1215 nucleosome assembly. Genes (Basel). 2017;8. doi:10.3390/genes8020049
- 1216 69. Yadav T, Whitehouse I. Replication-Coupled Nucleosome Assembly and  
1217 Positioning by ATP-Dependent Chromatin-Remodeling Enzymes. Cell Rep. The

- 1218 Authors; 2016;15: 715–723. doi:10.1016/j.celrep.2016.03.059
- 1219 70. Gassen A, Brechtefeld D, Schandry N, Arteaga-Salas JM, Israel L, Imhof A, et al.  
1220 DOT1A-dependent H3K76 methylation is required for replication regulation in  
1221 *Trypanosoma brucei*. *Nucleic Acids Res.* 2012;40: 10302–10311.  
1222 doi:10.1093/nar/gks801
- 1223 71. Janzen CJ, Hake SB, Lowell JE, Cross GAM. Selective Di- or Trimethylation of  
1224 Histone H3 Lysine 76 by Two DOT1 Homologs Is Important for Cell Cycle  
1225 Regulation in *Trypanosoma brucei*. *Mol Cell.* 2006;23: 497–507.  
1226 doi:10.1016/j.molcel.2006.06.027
- 1227 72. Siegel TN, Kawahara T, DeGrasse JA, Janzen CJ, Horn D, Cross GAM.  
1228 Acetylation of histone H4K4 is cell cycle regulated and mediated by HAT3 in  
1229 *Trypanosoma brucei*. *Mol Microbiol.* 2008;67: 762–771. doi:10.1111/j.1365-  
1230 2958.2007.06079.x
- 1231 73. Srivastava A, Badjatia N, Lee JH, Hao B, Günzl A. An RNA polymerase II-  
1232 associated TFIIIF-like complex is indispensable for SL RNA gene transcription in  
1233 *Trypanosoma brucei*. *Nucleic Acids Res.* 2017;46: 1695–1709.  
1234 doi:10.1093/nar/gkx1198
- 1235 74. Moldovan GL, Pfander B, Jentsch S. PCNA, the Maestro of the Replication Fork.  
1236 *Cell.* 2007;129: 665–679. doi:10.1016/j.cell.2007.05.003
- 1237 75. Yu C, Gan H, Han J, Zhou ZX, Jia S, Chabes A, et al. Strand-Specific Analysis  
1238 Shows Protein Binding at Replication Forks and PCNA Unloading from Lagging  
1239 Strands when Forks Stall. *Mol Cell.* Elsevier Inc.; 2014;56: 551–563.  
1240 doi:10.1016/j.molcel.2014.09.017
- 1241 76. Lööke M, Maloney MF, Bell SP. Mcm10 regulates DNA replication elongation by  
1242 stimulating the CMG replicative helicase. *Genes Dev.* 2017;31: 291–305.  
1243 doi:10.1101/gad.291336.116
- 1244 77. Zhu W, Ukomadu C, Jha S, Senga T, Dhar SK, Wohlschlegel J a, et al. Mcm10  
1245 and And-1 / CTF4 recruit DNA polymerase  $\alpha$  to chromatin for initiation of DNA  
1246 replication. *Genes Dev.* 2007; 2288–2299. doi:10.1101/gad.1585607.Mcm10
- 1247 78. Vos SM, Tretter EM, Schmidt BH, Berger JM. All tangled up: how cells direct,  
1248 manage and exploit topoisomerase function. *Nat Rev Mol Cell Biol.* Nature  
1249 Publishing Group; 2011;12: 827–41. doi:10.1038/nrm3228
- 1250 79. Champoux JJ. DNA T OPOISOMERASES : Structure , Function ,. *Annu Rev*  
1251 *Biochem.* 2001;70: 369–413.
- 1252 80. Canela A, Maman Y, Jung S, Wong N, Callen E, Day A, et al. Genome  
1253 Organization Drives Chromosome Fragility. *Cell.* 2017; 507–521.  
1254 doi:10.1016/j.cell.2017.06.034
- 1255 81. Singh BN, Achary VMM, Panditi V, Sopory SK, Reddy MK. Dynamics of tobacco  
1256 DNA topoisomerases II in cell cycle regulation: to manage topological constrains  
1257 during replication, transcription and mitotic chromosome condensation and  
1258 segregation. *Plant Mol Biol.* Springer Netherlands; 2017;94: 595–607.  
1259 doi:10.1007/s11103-017-0626-4
- 1260 82. Korolev S. Advances in structural studies of recombination mediator proteins.  
1261 *Biophys Chem.* Elsevier B.V.; 2017;225: 27–37. doi:10.1016/j.bpc.2016.12.001
- 1262 83. Dembowski JA, DeLuca NA. Selective Recruitment of Nuclear Factors to  
1263 Productively Replicating Herpes Simplex Virus Genomes. *PLoS Pathog.* 2015;11:



- 1264 1–35. doi:10.1371/journal.ppat.1004939
- 1265 84. Mazin A V., Mazina OM, Bugreev D V., Rossi MJ. Rad54, the motor of  
1266 homologous recombination. DNA Repair (Amst). Elsevier B.V.; 2010;9: 286–302.  
1267 doi:10.1016/j.dnarep.2009.12.006
- 1268 85. Li B. DNA double-strand breaks and telomeres play important roles in  
1269 *Trypanosoma brucei* antigenic variation. Eukaryot Cell. 2015;14: 196–205.  
1270 doi:10.1128/EC.00207-14
- 1271 86. McCulloch R, Barry JD. A role for RAD51 and homologous recombination in  
1272 *Trypanosoma brucei* antigenic variation. Genes Dev. 1999;13: 2875–2888.  
1273 doi:10.1101/gad.13.21.2875
- 1274 87. Sogo, J.M; Stahl, H;Koller, Th;Knippers R. Structure of Replicating Simian Virus  
1275 40 Minichromosomes The Replication Fork, Core Histone Segregation and  
1276 Terminal Structures. J mo. 1986; 189–204.
- 1277 88. MacAlpine DM, Macalpine DM, Rodriguez HK, Bell SP, Bell SP. Coordination of  
1278 replication and transcription along a. Genes Dev. 2004; 3094–3105.  
1279 doi:10.1101/gad.1246404.ster
- 1280 89. Lubelsky Y, Prinz J a, Denapoli L, Li Y, Belsky J a, Macalpine DM. DNA  
1281 replication and transcription programs respond to the same chromatin cues DNA  
1282 replication and transcription programs respond to the same chromatin cues.  
1283 Genome Res. 2014; 1102–1114. doi:10.1101/gr.160010.113
- 1284 90. Günzl A, Bruderer T, Laufer G, Tu L, Chung H, Lee P, et al. RNA Polymerase I  
1285 Transcribes Procyclin Genes and Variant Surface Glycoprotein Gene Expression  
1286 Sites in *Trypanosoma brucei* RNA Polymerase I Transcribes Procyclin Genes and  
1287 Variant Surface Glycoprotein Gene Expression Sites in *Trypanosoma brucei*.  
1288 Eukaryot Cell. 2003;2: 542–551. doi:10.1128/EC.2.3.542
- 1289 91. Marchetti MA, Tschudi C, Silva E, Ullu E. Physical and transcriptional analysis of  
1290 the *Trypanosoma brucei* genome reveals a typical eukaryotic arrangement with  
1291 close interspersed of RNA polymerase II- and III-transcribed genes. Nucleic  
1292 Acids Res. 1998;26: 3591–3598. doi:10.1093/nar/26.15.3591
- 1293 92. Wedel C, Förstner KU, Derr R, Siegel TN. GT-rich promoters can drive RNA pol II  
1294 transcription and deposition of H2A.Z in African trypanosomes. EMBO J. 2017;36:  
1295 e201695323. doi:10.15252/embj.201695323
- 1296 93. Alsford S, Turner DJ, Obado SO, Sanchez-flores A, Glover L, Berriman M, et al.  
1297 High-throughput phenotyping using parallel sequencing of RNA interference  
1298 targets in the African trypanosome High-throughput phenotyping using parallel  
1299 sequencing of RNA interference targets in the African trypanosome. Genome  
1300 Res. 2011;21: 915–924. doi:10.1101/gr.115089.110
- 1301 94. Archer SK, Inchaustegui D, Queiroz R, Clayton C. The cell cycle regulated  
1302 transcriptome of *Trypanosoma brucei*. PLoS One. 2011;6.  
1303 doi:10.1371/journal.pone.0018425
- 1304 95. Urbaniak MD, Martin DMA, Ferguson MAJ. Global quantitative SILAC  
1305 phosphoproteomics reveals differential phosphorylation is widespread between  
1306 the procyclic and bloodstream form lifecycle stages of *Trypanosoma brucei*. J  
1307 Proteome Res. 2013;12: 2233–2244. doi:10.1021/pr400086y
- 1308 96. Errico A, Deshmukh K, Tanaka Y, Pozniakovsky A, Hunt T. Identification of  
1309 substrates for cyclin dependent kinases. Adv Enzyme Regul. Elsevier Ltd;

- 1310 2010;50: 375–399. doi:10.1016/j.advenzreg.2009.12.001
- 1311 97. Chang EJ, Begum R, Chait BT, Gaasterland T. Prediction of Cyclin-Dependent  
1312 Kinase Phosphorylation Substrates. PLoS One. 2007;2: e656.  
1313 doi:10.1371/journal.pone.0000656
- 1314 98. Johnson N, Shapiro GI. Cyclin-dependent kinases (cdks) and the DNA damage  
1315 response: rationale for cdk inhibitor–chemotherapy combinations as an anticancer  
1316 strategy for solid tumors. Expert Opin Ther Targets. 2010;14: 1199–1212.  
1317 doi:10.1111/j.1743-6109.2008.01122.x.Endothelial
- 1318 99. Durocher D, Jackson SP. The FHA domain. FEBS Lett. 2002;513: 58–66.  
1319 doi:10.1016/S0014-5793(01)03294-X
- 1320 100. Neuwald AF. Evolutionary clues to eukaryotic DNA clamp-loading mechanisms :  
1321 analysis of the functional constraints imposed on replication factor C AAA +  
1322 ATPases. Nucleic Acids Res. 2005;33: 3614–3628. doi:10.1093/nar/gki674
- 1323 101. Johnson A, Yao NY, Bowman GD, Kuriyan J, Donnell MO. The Replication Factor  
1324 C Clamp Loader Requires Arginine Finger Sensors to Drive DNA Binding and  
1325 Proliferating Cell Nuclear Antigen Loading. J Biol Chem. 2006;281: 35531–35543.  
1326 doi:10.1074/jbc.M606090200
- 1327 102. Kim J, MacNeill SA. Genome Stability: A New Member of the RFC family. Curr  
1328 Biol. 2003;13: 873–875. doi:10.1016/j.cub.2003.10.048
- 1329 103. Shiomi Y, Nishitani H. Control of genome integrity by RFC complexes; conductors  
1330 of PCNA loading onto and unloading from chromatin during DNA replication.  
1331 Genes (Basel). 2017;8. doi:10.3390/genes8020052
- 1332 104. Shiomi Y, Hayashi A, Ishii T, Shinmyozu K, Nakayama J -i., Sugasawa K, et al.  
1333 Two Different Replication Factor C Proteins, Ctf18 and RFC1, Separately Control  
1334 PCNA-CRL4Cdt2-Mediated Cdt1 Proteolysis during S Phase and following UV  
1335 Irradiation. Mol Cell Biol. 2012;32: 2279–2288. doi:10.1128/MCB.06506-11
- 1336 105. Yao NY, Donnell MO. The RFC Clamp Loader: Structure and Function. Subcell  
1337 Biochem. 2012;62: 259–279. doi:10.1007/978-94-007-4572-8
- 1338 106. Hanna JS, Kroll ES, Lundblad V, Spencer F a. *Saccharomyces cerevisiae* CTF18  
1339 and CTF4 are required for sister chromatid cohesion. Mol Cell Biol. 2001;21:  
1340 3144–3158. doi:10.1128/MCB.21.9.3144-3158.2001
- 1341 107. Aroya S Ben, Kupiec M. The Elg1 replication factor C-like complex: A novel  
1342 guardian of genome stability. DNA Repair (Amst). 2005;4: 409–417.  
1343 doi:10.1016/j.dnarep.2004.08.003
- 1344 108. Zou L, Cortez D, Elledge SJ. Regulation of ATR substrate selection by Rad17-  
1345 dependent loading of Rad9 complexes onto chromatin. Genes Dev. 2002;16:  
1346 198–208. doi:10.1101/gad.950302
- 1347 109. Hammarton TC, Clark J, Douglas F, Boshart M, Mottram JC. Stage-specific  
1348 differences in cell cycle control in *Trypanosoma brucei* revealed by RNA  
1349 interference of a mitotic cyclin. J Biol Chem. 2003;278: 22877–22886.  
1350 doi:10.1074/jbc.M300813200
- 1351 110. Li Z, Wang CC. A PHO80-like cyclin and a B-type cyclin control the cell cycle of  
1352 the procyclic form of *Trypanosoma brucei*. J Biol Chem. 2003;278: 20652–20658.  
1353 doi:10.1074/jbc.M301635200
- 1354 111. Tu X, Wang CC. The Involvement of Two cdc2-related Kinases (CRKs) in  
1355 *Trypanosoma brucei* Cell Cycle Regulation and the Distinctive Stage-specific

- 1356 Phenotypes Caused by CRK3 Depletion. J Biol Chem. 2004;279: 20519–20528.  
1357 doi:10.1074/jbc.M312862200  
1358 112. Ploubidou a, Robinson DR, Docherty RC, Ogbadoyi EO, Gull K. Evidence for  
1359 novel cell cycle checkpoints in trypanosomes: kinetoplast segregation and  
1360 cytokinesis in the absence of mitosis. J Cell Sci. 1999;112 ( Pt 2: 4641–4650.  
1361

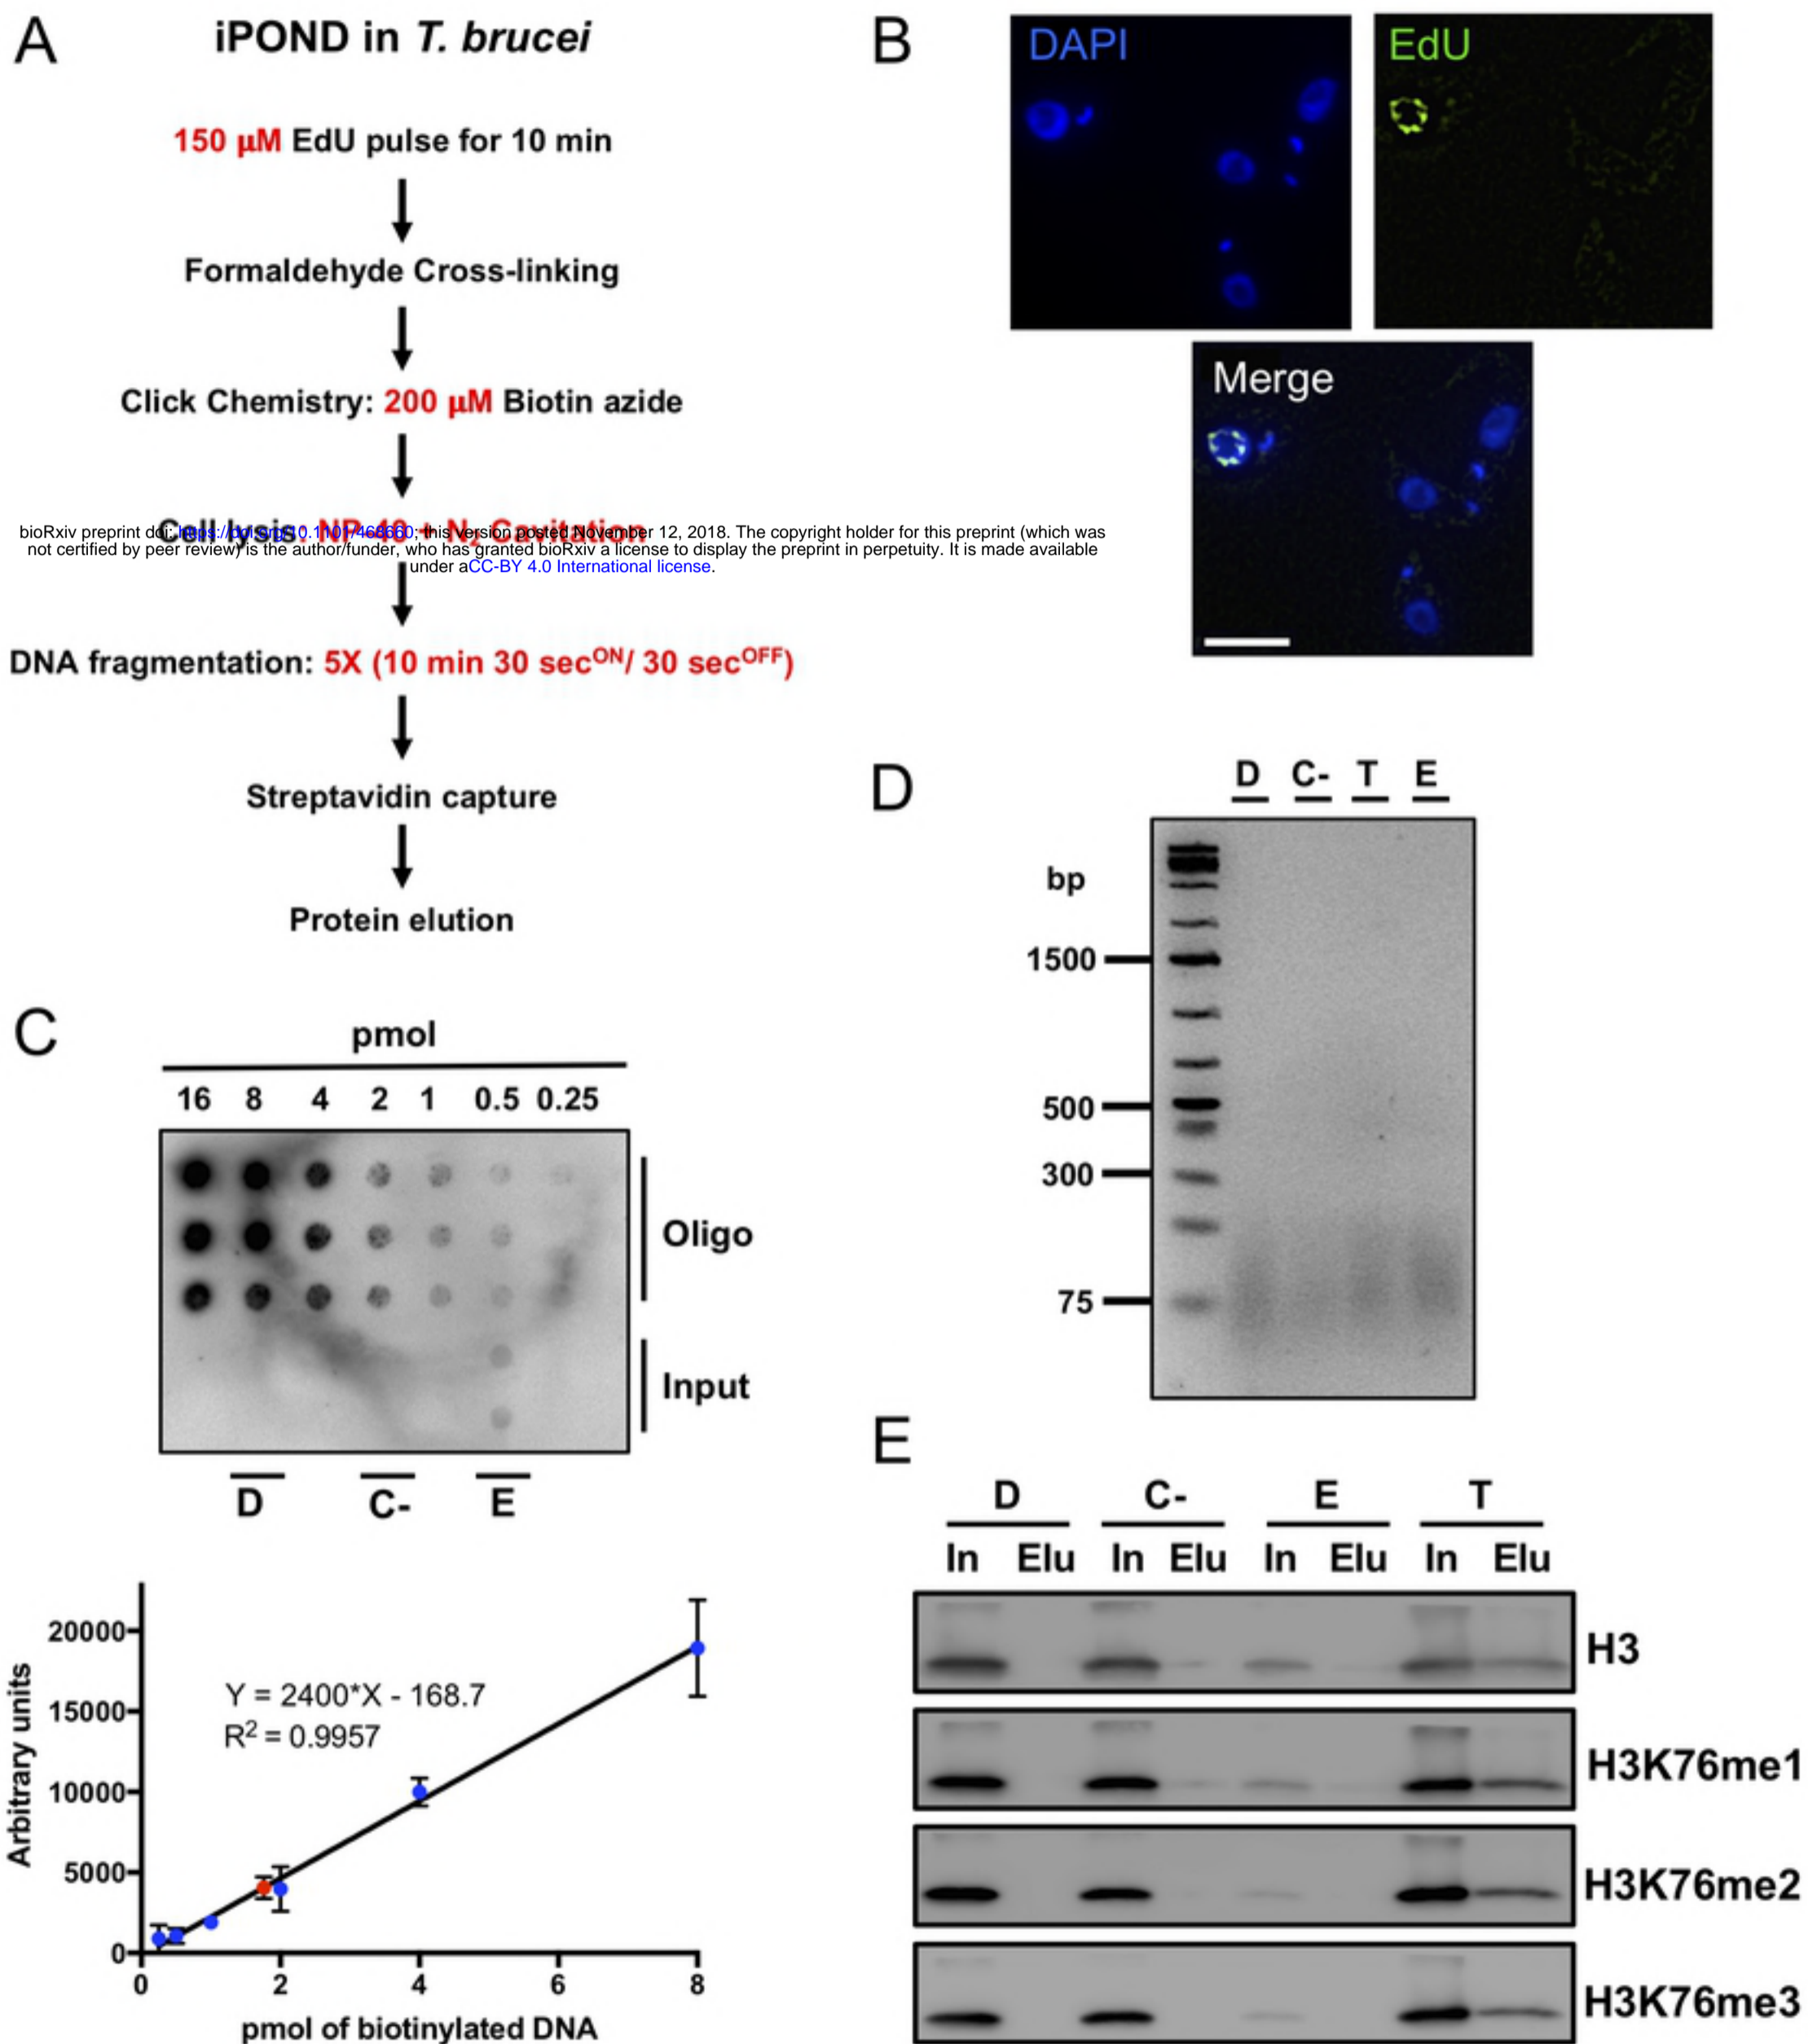

Figure 1



**A**

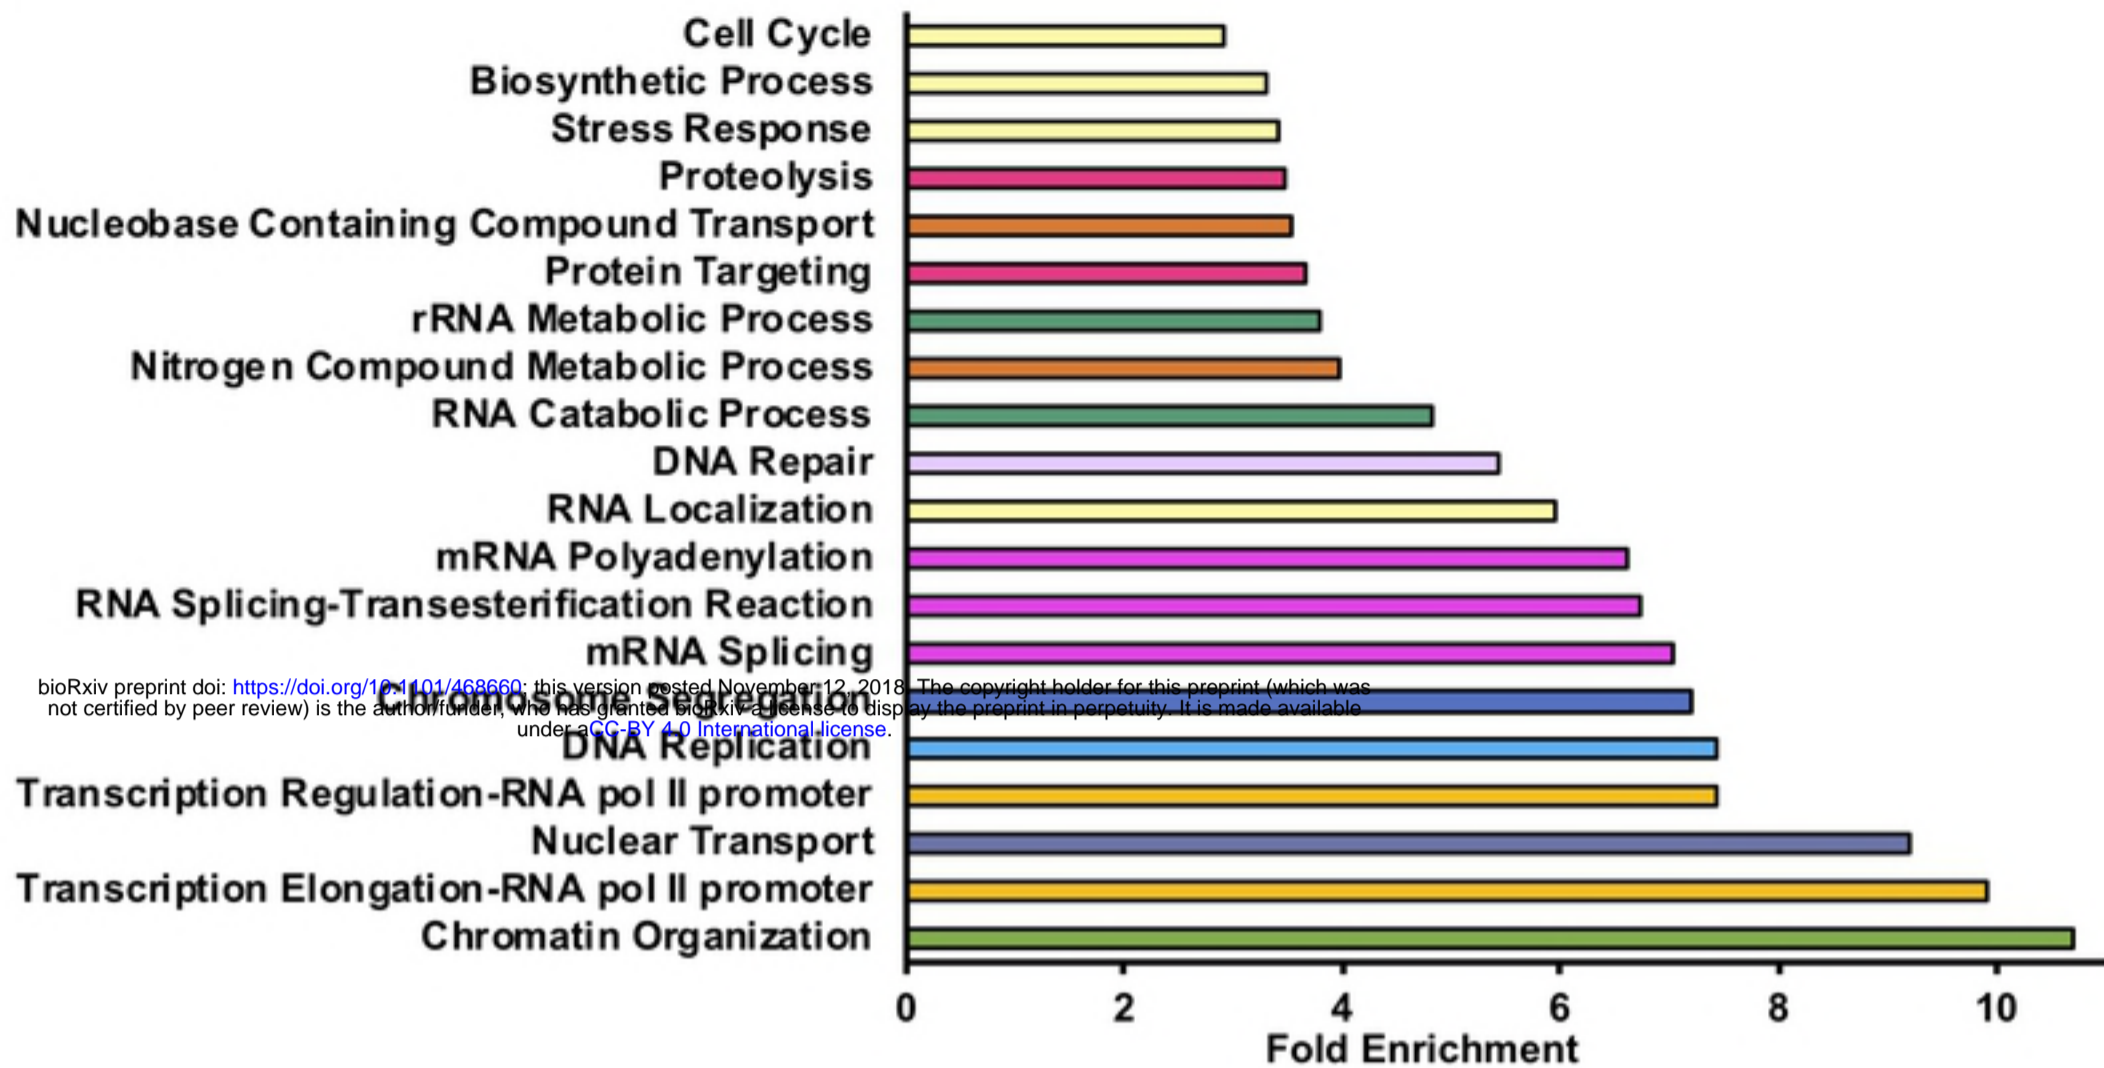

**B**

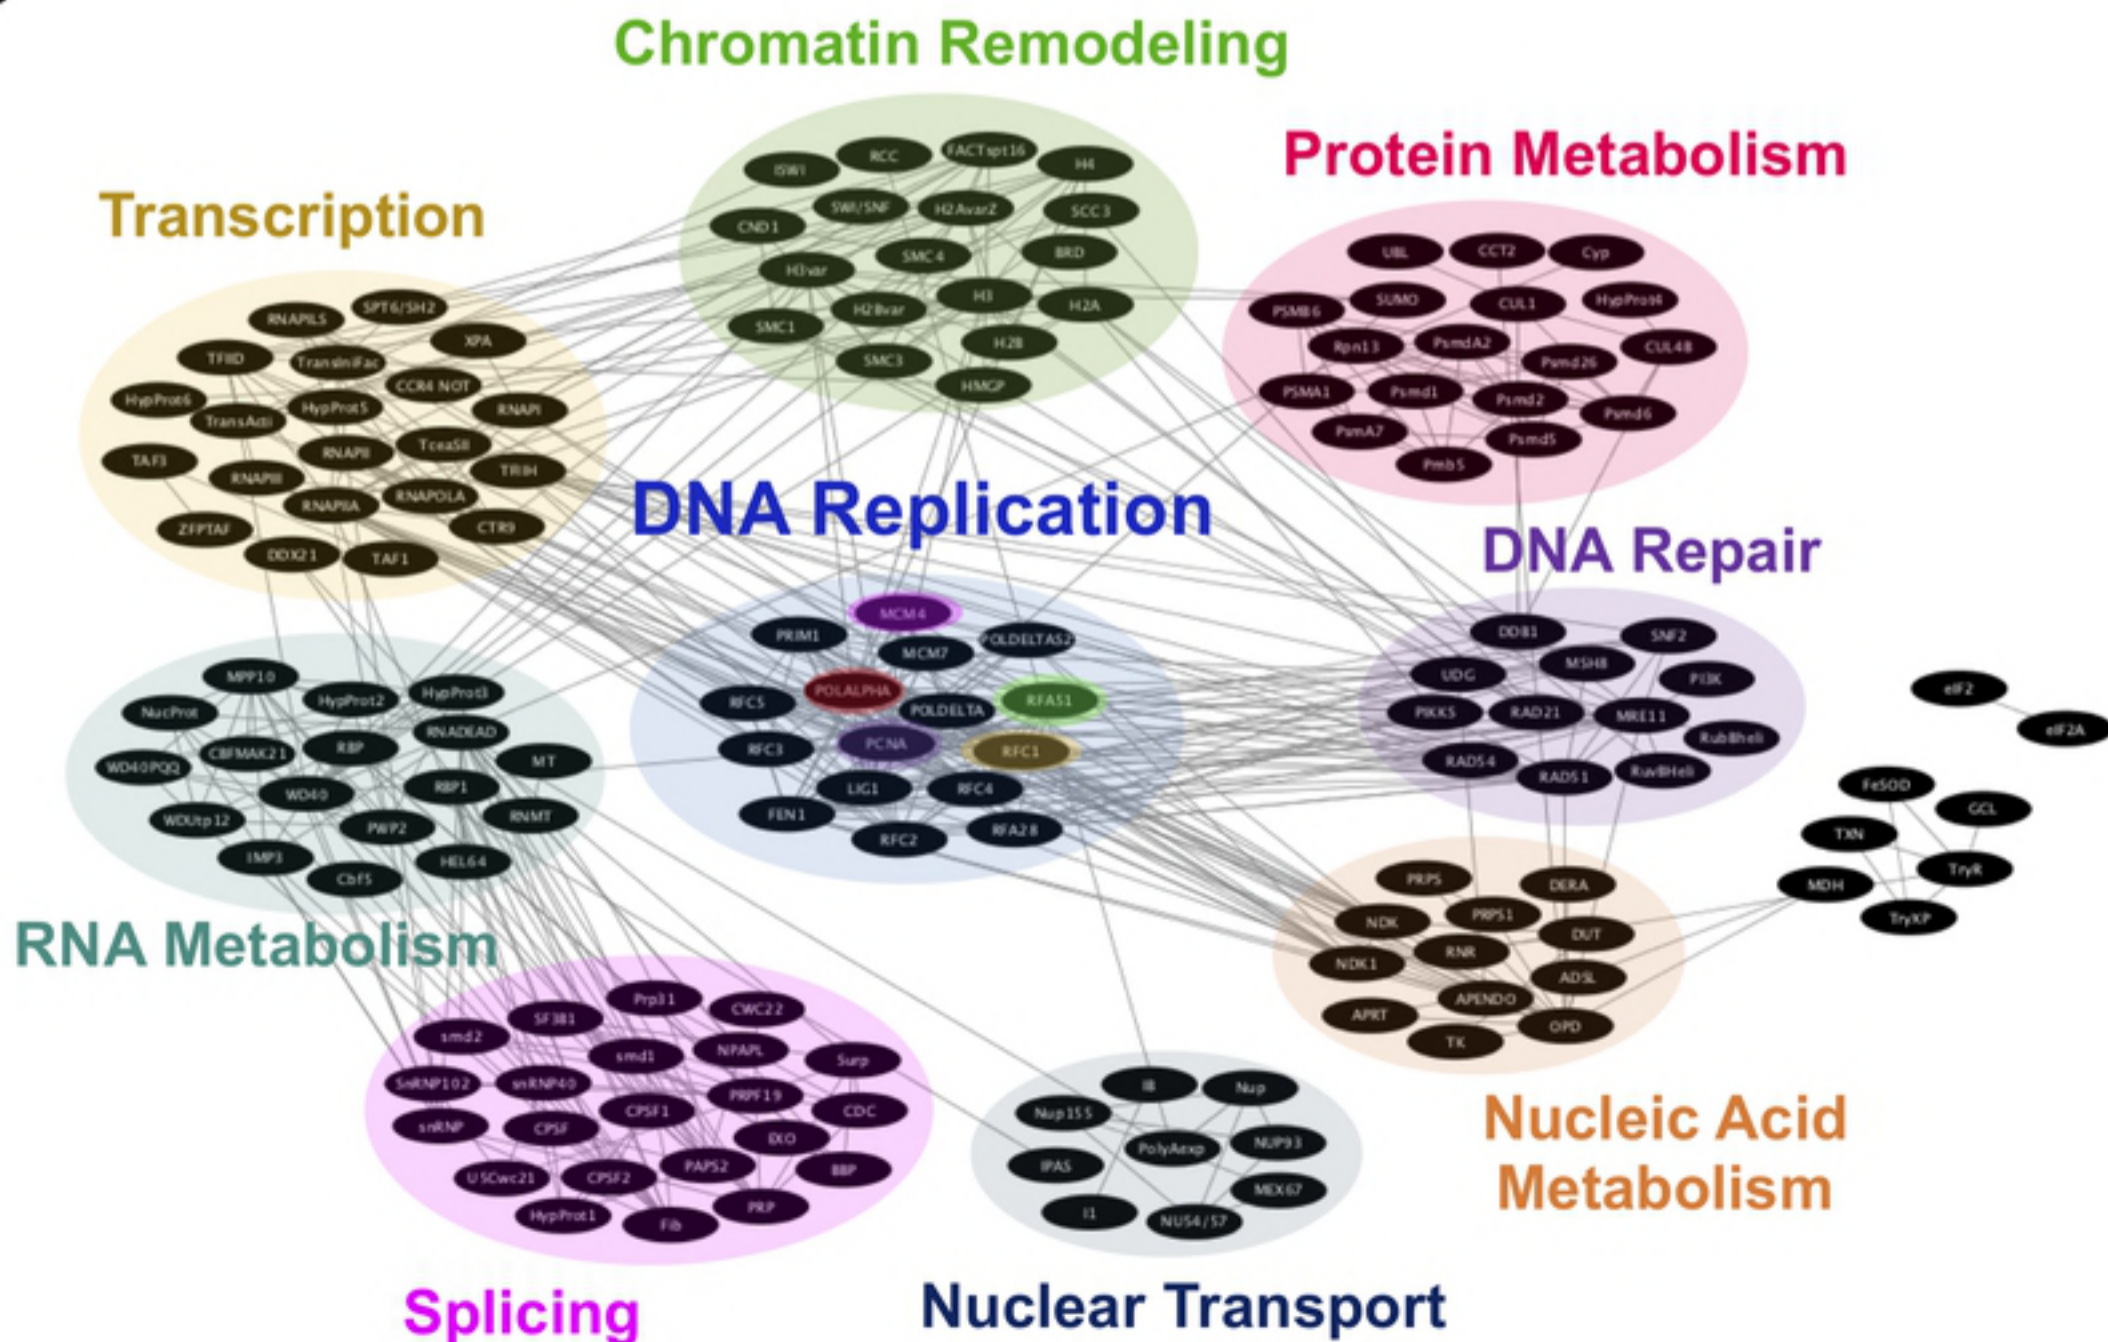

Figure 2

**A**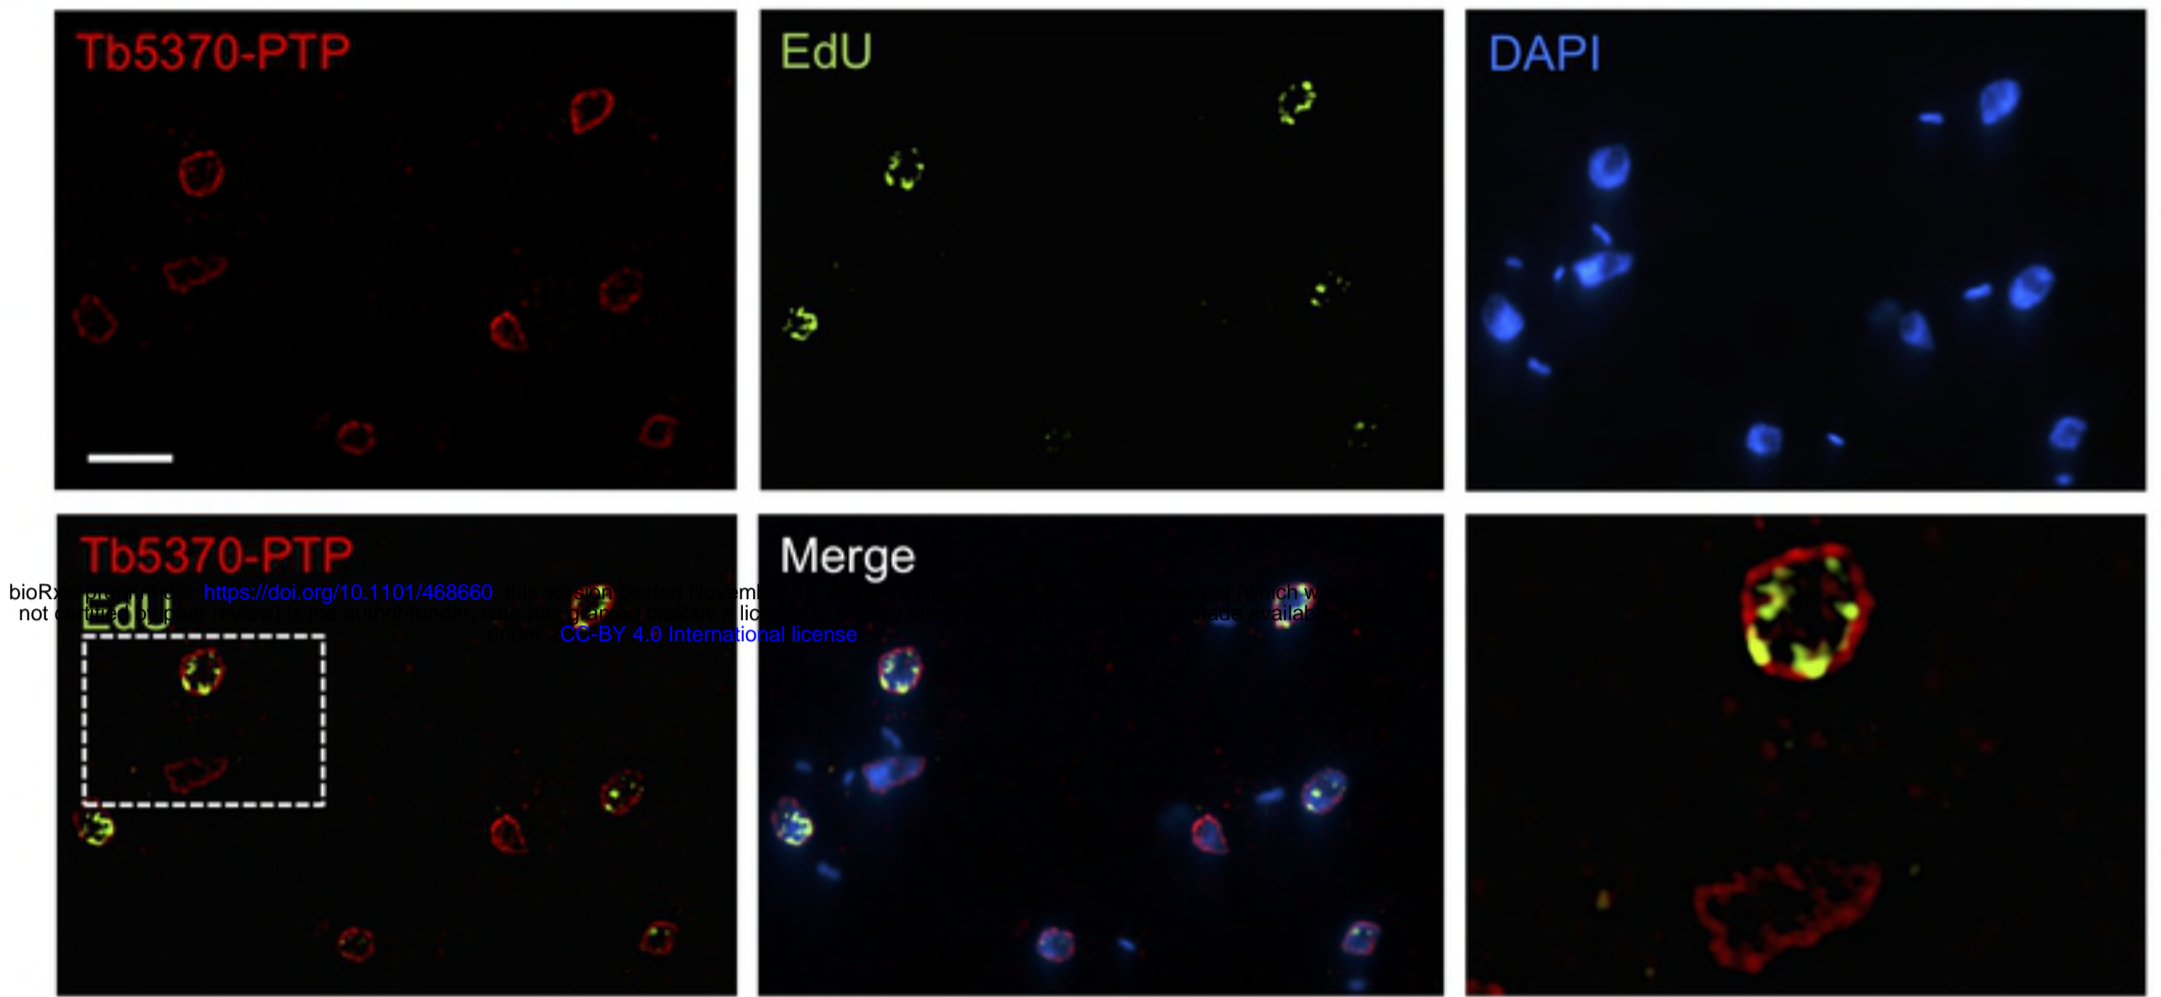**B**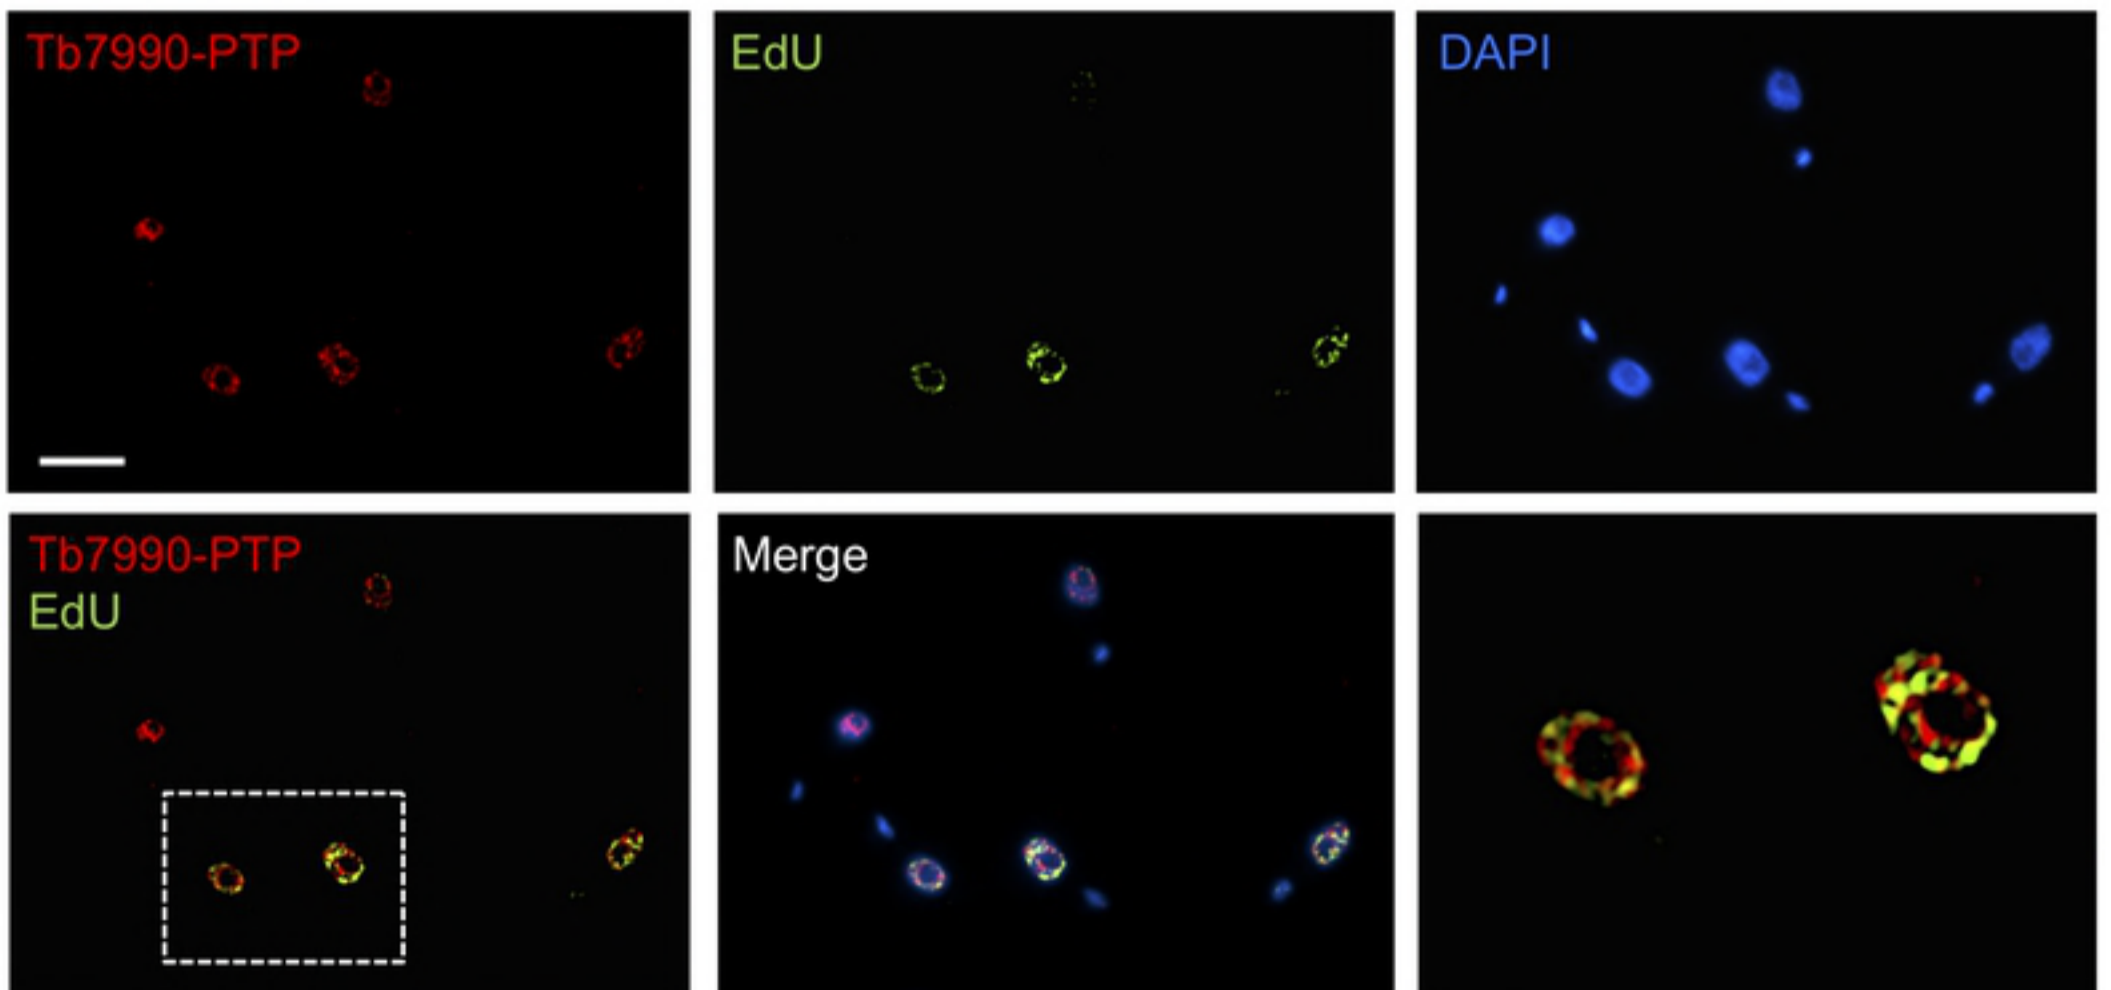**Figure 3**



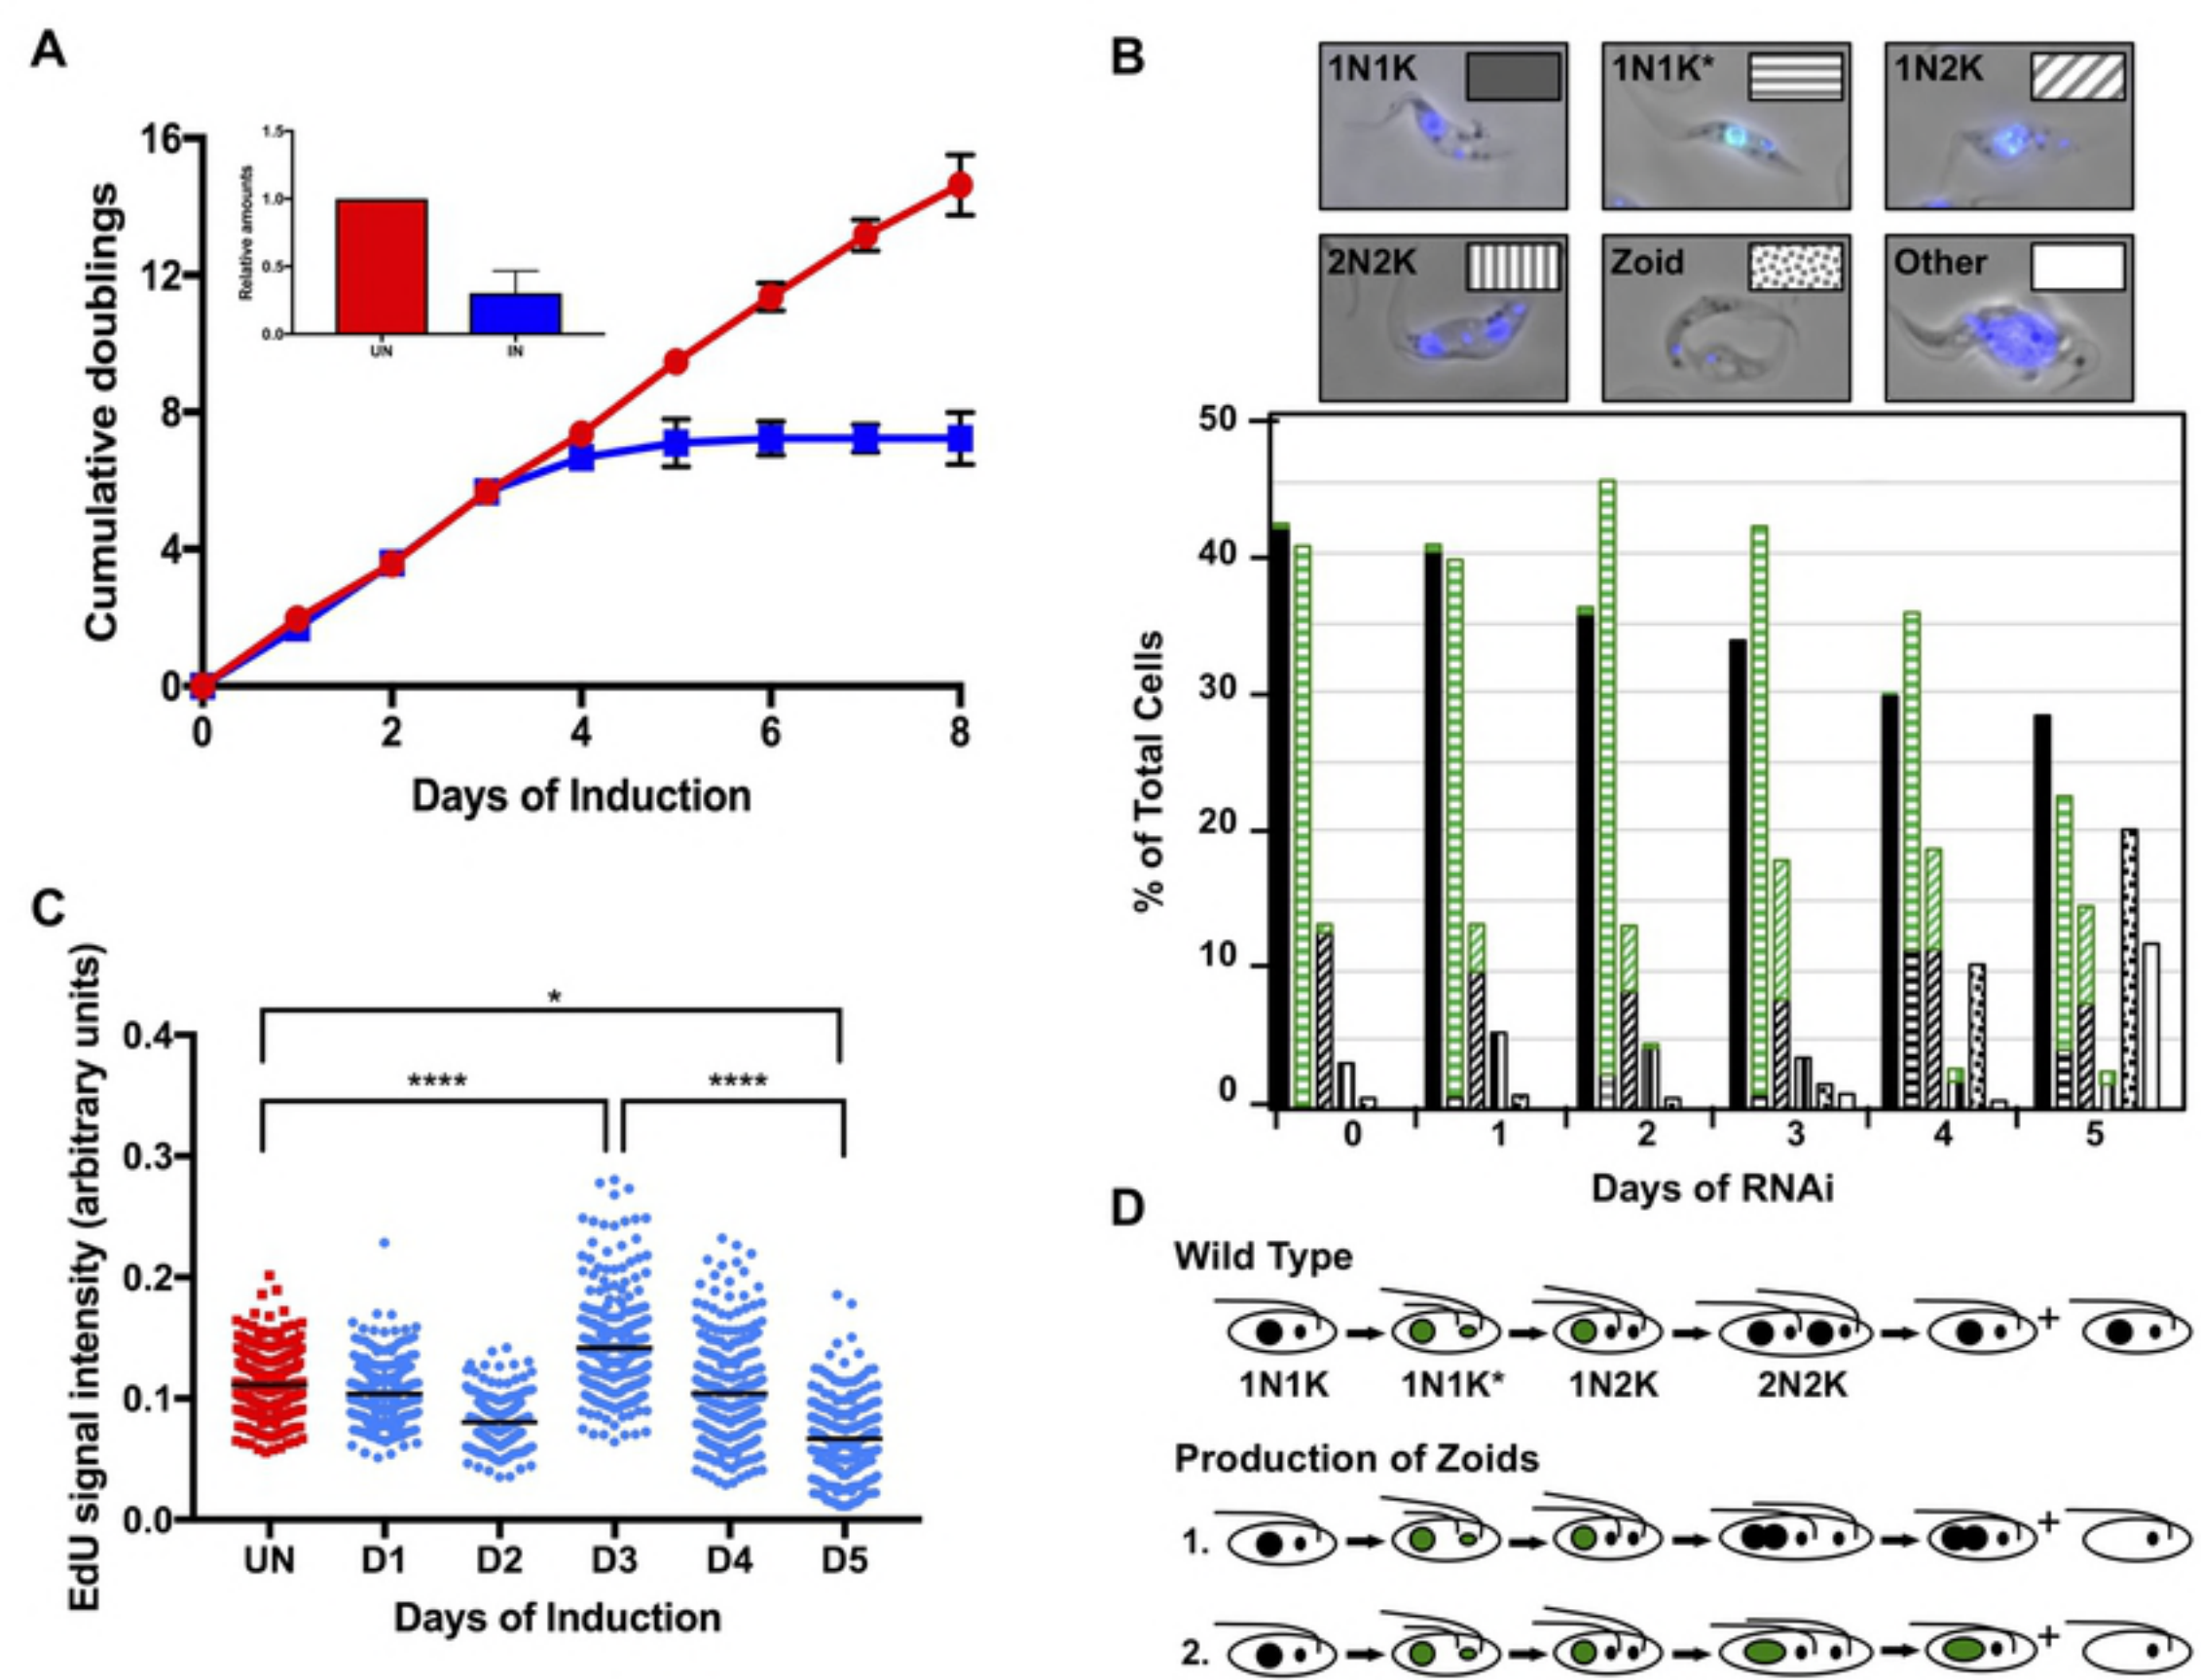

Figure 4
